# Supplementary material for: Micelle promoted multicomponent synthesis of 3-amino alkylated indoles via a Mannich-type reaction in water
Source: Royal Society of Chemistry journal article supplement (doi:10.1039/c2ra22428c), 2012-11-30

## Supporting Information

### Micelle promoted multicomponent synthesis of 3-amino alkylated indoles *via* Mannich-type reaction in water

#### General Considerations.

1. Reagent grade solvents were used for extraction and flash chromatography. All the reagents and chemicals were purchased from Sigma–Aldrich Chemical Co, Lancaster and were used directly without further purification. The progress of reactions was checked by analytical thin-layer chromatography (TLC, Merck silica gel 60 F-254 plates). The plates were visualized first with UV illumination followed by iodine. Flash column chromatography was performed using silica gel (230-400 mesh). The solvent compositions reported for all chromatographic separations are on a volume/volume (v/v) basis.  $^1\text{H}$ -NMR spectra were recorded at either 200 or 300 MHz and are reported in parts per million (ppm) on the  $\delta$  scale relative to tetramethylsilane as an internal standard.  $^{13}\text{C}$ -NMR spectra were recorded at either 50 or 75 MHz and are reported in parts per million (ppm) on the  $\delta$  scale relative to  $\text{CDCl}_3$  ( $\delta$  77.00). Mass spectra were obtained using JEOL SX-102 (ESI) instrument. Melting points were determined on a Mel Temp II melting point apparatus and are uncorrected.

2. **General procedure for the synthesis of compound (4).** In a typical experiment, the aldehyde (1 mmol), secondary amine (1.2 mmol) and SDS (20 mol %) were taken in water (2 mL) in a round-bottom flask and was stirred at 80 °C temperature for 5 min. A white turbid mixture was obtained and then indole (1 mmol) was added. The reaction mixture was stirred till the completion of the reaction (monitored by TLC). After completion the reaction, mixture was extracted with ethyl acetate, dried over sodium sulphate and evaporated under vacuum to give crude product, which was purified by silica gel (230-400 mesh) column chromatography with hexane/ethyl acetate (2:3) as eluent to afford the corresponding product.

#### 3-(Phenyl(piperidin-1-yl)methyl)-1H-indole (4a).

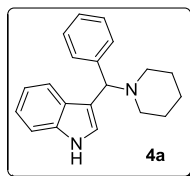

**White solid; mp: 112 °C;  $^1\text{H}$  NMR (300 MHz,  $\text{CDCl}_3$ )**  $\delta$  1.0-1.14 (m, 6H), 1.72-1.82 (m, 2H), 2.04-2.15 (m, 2H), 4.67 (s, 1H), 6.40 (s, 1H), 6.61-6.77 (m, 7H), 6.82-6.91 (m, 1H), 7.44-7.53 (m, 1H);  **$^{13}\text{C}$ , 50 MHz ( $\text{CDCl}_3$ ):** 142.97, 136.49, 136.18, 128.10, 128.04, 126.45, 122.85, 121.71, 120.25, 119.19, 117.44, 111.01, 68.58, 52.83, 26.24, 24.66; **ESIMS:** m/z 291 (M+H); **IR** (KBr): 3400, 3066, 2821, 1493, 1395, 1219, 1164, 753  $\text{cm}^{-1}$ ; Analysis calculated for  $\text{C}_{20}\text{H}_{22}\text{N}_2$ : C, 82.72; H, 7.64; N, 9.65; found: C, 82.60; H, 7.54; N, 9.59%; HRMS (ES): calculated: 290.1783; found: 290.1791.

**3-(Piperidin-1-yl(pyridin-4-yl)methyl)-1H-indole (4b).**

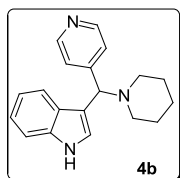

**White solid; mp: 135-137 °C; <sup>1</sup>H NMR (300 MHz, CDCl<sub>3</sub>)** δ 1.54-1.61 (m, 6H), 2.37-2.46 (m, 4H), 4.68 (s, 1H), 7.03-7.31(m, 4H), 7.46 (d, 2H, *J* = 5.7 Hz), 7.73 (d, 1H, *J* = 7.7Hz), 8.48 (d, 2H, *J* = 5.9 Hz), 8.94 (br, s, 1H); **<sup>13</sup>C, 50 MHz (CDCl<sub>3</sub>):** 152.69, 149.38, 136.43, 126.65, 123.57, 123.40, 123.22, 121.93, 120.09, 119.40, 115.26, 111.23, 67.51, 52.62, 26.26, 24.53; **ESIMS:** *m/z* 292 (M+H); **IR (KBr):** 3420, 3069, 2829, 1489, 1393, 1217, 1158, 748 cm<sup>-1</sup>; Analysis calculated for C<sub>19</sub>H<sub>21</sub>N<sub>3</sub>: C, 78.32; H, 7.26; N, 14.42; found: C, 78.25; H, 7.19; N, 14.33%; HRMS (ES): calculated: 291.1735; found: 291.1722.

**3-((2-Chlorophenyl)(piperidin-1-yl)methyl)-1H-indole (4c).**

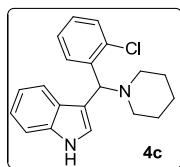

**White semi solid; <sup>1</sup>H NMR (200 MHz, CDCl<sub>3</sub>)** δ 1.82-1.86 (m, 6H), 2.86-2.90 (m, 4H), 5.70 (s, 1H), 7.23-7.35 (m, 1H), 7.40-7.49 (m, 3H), 7.62-7.77 (m, 4H), 8.28 (d, 1H, *J* = 7.3 Hz), 8.38 (br, s, 1H); **<sup>13</sup>C, 50 MHz (CDCl<sub>3</sub>):** 137.32, 136.79, 134.06, 132.45, 130.47, 130.02, 127.88, 127.35, 127.00, 122.13, 121.15, 120.14, 115.23, 113.49, 71.29, 51.09, 24.68, 23.42; **ESIMS:** *m/z* 325 (M+H); **IR (KBr):** 3424, 3063, 2820, 1491, 1389, 1227, 1165, 752 cm<sup>-1</sup>; Analysis calculated for C<sub>20</sub>H<sub>21</sub>ClN<sub>2</sub>: C, 73.95; H, 6.52; N, 8.62; found: C, 73.82; H, 6.43; N, 8.55%; HRMS (ES): calculated: 324.1393; found: 324.1385.

**3-((5-Nitrothiophen-2-yl)(piperidin-1-yl)methyl)-1H-indole (4d).**

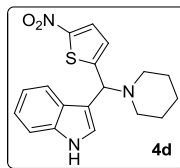

**Yellow solid; mp: 130-133 °C; <sup>1</sup>H NMR (200 MHz, CDCl<sub>3</sub>)** δ 1.51 (s, 6H), 2.48 (s, 4H), 5.38 (s, 1H), 6.97-7.05 (m, 1H), 7.11-7.21 (m, 2H), 7.40-7.49 (m, 2H), 8.86 (d, 1H, *J* = 5.2 Hz), 7.90 (br, s, 1H), 7.99 (d, 1H, *J* = 7.65 Hz); **<sup>13</sup>C, 50 MHz (CDCl<sub>3</sub>):** 167.77, 153.97, 137.32, 130.74, 127.00, 125.21, 122.13, 121.15, 120.14, 119.80, 113.49, 112.08, 69.48, 51.70, 24.68, 23.42; **ESIMS:** *m/z* 342 (M+H); **IR (KBr):** 3429, 3063, 2820, 1515, 1387, 1213, 1163, 759 cm<sup>-1</sup>; Analysis calculated for C<sub>18</sub>H<sub>19</sub>N<sub>3</sub>O<sub>2</sub>S: C, 63.32; H, 5.61; N, 12.31; found: C, 63.25; H, 5.66; N, 12.28%; HRMS (ES): calculated 341.1198; found: 341.1187.

**3-(Phenyl(pyrrolidin-1-yl)methyl)-1H-indole (4e).**

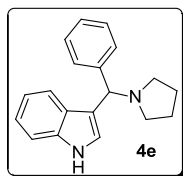

**White solid; mp: 145-147 °C; <sup>1</sup>H NMR (300 MHz, CDCl<sub>3</sub>)** δ 1.75 (s, 4H), 2.51 (d, 4H, *J* = 6.5 Hz), 4.59 (s, 1H), 7.04-7.15(m, 4H), 7.21-7.26 (m, 3H), 7.54 (d, 2H, *J* = 7.2 Hz), 7.82 (d, 1H, *J* = 7.5 Hz), 8.10 (br, s, 1H); **<sup>13</sup>C, 50MHz (CDCl<sub>3</sub>):** 144.41, 136.08, 128.16, 127.69, 126.53, 122.0, 121.79, 119.73, 119.39, 119.30, 111.01, 67.97, 53.68, 23.51. **ESIMS:** *m/z* 277 (M+H). **IR** (KBr): 3417, 3063, 2824, 1494, 1392, 1213, 1164, 754 cm<sup>-1</sup>; Analysis calculated for C<sub>19</sub>H<sub>20</sub>N<sub>2</sub>: C, 82.57; H, 7.29; N, 10.14%; found: C, 82.50; H, 7.21; N, 10.05%; HRMS (ES): calculated 276.1626; found: 276.1632.

**3-((2,4-Dichlorophenyl)(pyrrolidin-1-yl)methyl)-1H-indole (4f).**

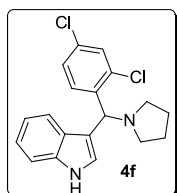

**White solid; mp: 141-143 °C; <sup>1</sup>H NMR (200 MHz, CDCl<sub>3</sub>)** δ 1.38-1.45 (m, 4H), 2.36 (s, 4H), 4.92 (s, 1H), 6.60 (s, 1H), 6.65-6.70 (m, 2H), 6.81 (s, 2H), 6.86-6.91 (m, 1H), 7.09 (s, 1H), 7.18-7.22 (m, 1H), 9.61 (s, 1H); **<sup>13</sup>C, 50 MHz (CDCl<sub>3</sub>):** 137.32, 136.06, 135.10, 133.92, 130.29, 128.40, 127.88, 127.00, 122.12, 121.14, 120.14, 115.23, 113.48, 71.30, 54.14, 24.76; **ESIMS:** *m/z* 345 (M+H); **IR** (KBr): 3435, 3056, 2825, 1491, 1397, 1207, 1172, 751 cm<sup>-1</sup>; Analysis calculated for C<sub>19</sub>H<sub>18</sub>Cl<sub>2</sub>N<sub>2</sub>: C, 66.09; H, 5.25; N, 8.11; found: C, 66.18; H, 5.19; N, 8.03%; HRMS (ES): calculated 344.0847; found: 344.0838.

**1-(1H-indol-3-yl)-N,N-dimethyl-1-phenylmethanamine (4g).**

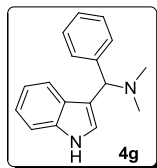

**White solid; mp: 109 °C; <sup>1</sup>H NMR (200 MHz, CDCl<sub>3</sub>)** δ 1.70 (s, 6H), 4.98 (s, 1H), 6.59-6.74 (m, 2H), 6.83-6.85 (m, 3H), 6.94-7.03 (m, 4H), 7.20 (s, 1H), 7.42 (d, 1H, *J* = 6.8 Hz); **<sup>13</sup>C, 50 MHz (CDCl<sub>3</sub>):** 137.32, 136.43, 129.61, 129.24, 128.77, 128.12, 127.00, 122.13, 121.15, 120.14, 115.35, 113.49, 74.28, 41.64; **ESIMS:** *m/z* 251 (M+H); **IR** (KBr): 3400, 3066, 2821, 1484, 1395, 1227, 1164, 759 cm<sup>-1</sup>; Analysis calculated for C<sub>17</sub>H<sub>18</sub>N<sub>2</sub>: C, 81.56; H, 7.25; N, 11.19%; found: C, 81.62; H, 7.18; N, 11.24%; HRMS (ES): calculated: 250.1470; found: 250.1481.

**1-(1H-indol-3-yl)-1-(2-methoxyphenyl)-N,N-dimethylmethanamine (4h).**

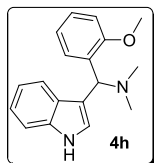

**Colourless liquid;**  $^1\text{H}$  NMR (200 MHz,  $\text{CDCl}_3$ )  $\delta$  1.93 (s, 6H), 3.46 (s, 3H), 5.00 (s, 1H), 6.63-6.70 (m, 2H), 6.84 (s, 1H), 6.90-6.92 (m, 2H), 6.99-7.14 (m, 3H), 7.27-7.32 (m, 1H), 8.59 (br, s, 1H);  $^{13}\text{C}$ , 50 MHz ( $\text{CDCl}_3$ ): 158.18, 137.32, 133.53, 129.45, 128.35, 127.00, 126.35, 122.44, 122.13, 121.15, 120.14, 115.98, 113.49, 112.25, 74.13, 56.79, 41.64; **ESIMS:** m/z 281 (M+H); **IR** (KBr): 3451, 3060, 2825, 1481, 1393, 1223, 1156, 758  $\text{cm}^{-1}$ ; Analysis calculated for  $\text{C}_{18}\text{H}_{20}\text{N}_2\text{O}$ : C, 77.11; H, 7.19; N, 9.99; found: C, 77.02; H, 7.08; N, 9.86 %; HRMS (ES): calculated 280.1576; found: 280.1570.

**1-(1-Benzyl-1H-indol-3-yl)-1-(4-fluorophenyl)-N,N-dimethylmethanamine (4i).**

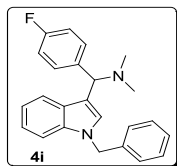

**Brown liquid;**  $^1\text{H}$  NMR (200 MHz,  $\text{CDCl}_3$ )  $\delta$  2.02 (s, 6H), 4.83 (s, 1H), 5.15 (s, 2H), 6.75 (d, 1H,  $J = 7.7$  Hz), 6.88-7.03 (m, 5H), 7.07-7.19 (m, 2H), 7.19-7.32 (m, 4H), 7.40 (s, 1H), 7.51 (d, 1H,  $J = 6.7$  Hz);  $^{13}\text{C}$ , 50 MHz ( $\text{CDCl}_3$ ): 162.44, 139.77, 139.44, 137.47, 132.91, 131.44, 131.30, 128.68, 128.48, 127.74, 123.83, 123.52, 121.86, 115.62, 114.34, 114.00, 73.68, 52.89, 41.64; **ESIMS:** m/z 359 (M+H); **IR** (KBr): 3064, 2820, 1487, 1383, 1211, 1162, 753  $\text{cm}^{-1}$ ; Analysis calculated for  $\text{C}_{24}\text{H}_{23}\text{FN}_2$ : C, 80.42; H, 6.47; N, 7.82; found: C, 80.35; H, 6.39; N, 7.78%; HRMS (ES): calculated 358.1845; found: 358.1852.

**1-Benzyl-3-((4-chlorophenyl)(piperidin-1-yl)methyl)-1H-indole (4j).**

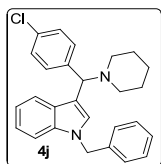

**White solid; mp: 155-157  $^{\circ}\text{C}$ ;**  $^1\text{H}$  NMR (200 MHz,  $\text{CDCl}_3$ )  $\delta$  0.86-1.14 (m, 6H), 1.67-1.81 (m, 2H), 1.98-2.11 (m, 2H), 4.46 (s, 2H), 4.58 (s, 1H), 6.49-6.76 (m, 11 H), 6.79-6.92 (m, 1H), 7.07 (s, 1H), 7.26-7.37 (m, 1H);  $^{13}\text{C}$ , 50 MHz ( $\text{CDCl}_3$ ): 139.88, 139.77, 137.46, 135.62, 133.20, 131.43, 131.28, 129.35, 129.19, 128.67, 128.59, 128.47, 128.35, 127.73, 123.82, 123.51, 121.86, 113.99, 112.71, 71.94, 52.88, 24.68, 23.42; **ESIMS:** m/z 415 (M+H); **IR** (KBr): 3048, 2883, 2951, 2790, 1395, 1217, 1166, 754  $\text{cm}^{-1}$ ; Analysis calculated for  $\text{C}_{27}\text{H}_{27}\text{ClN}_2$ : C, 78.15; H, 6.56; N, 6.75%; found: C, 78.05; H, 6.42; N, 6.66%; HRMS (ES): calculated 414.1863; found: 414.1871.

**3-((4-Methoxyphenyl)(piperidin-1-yl)methyl)-1-methyl-1H-indole (4k).**

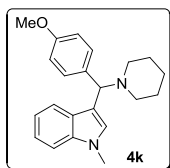

**White solid; mp: 124 °C; <sup>1</sup>H NMR (200 MHz, CDCl<sub>3</sub>)** δ 0.84-1.07 (m, 6H), 1.65-1.79 (m, 2H), 1.98-2.11 (m, 2H), 3.06 (s, 3H), 3.13 (s, 3H), 4.58 (s, 1H), 6.16-6.25 (2H), 6.57-6.75 (m, 6H), 7.37-7.58 (m, 1H).; **<sup>13</sup>C, 50 MHz (CDCl<sub>3</sub>):** 159.99, 139.88, 139.69, 130.17, 130.07, 124.77, 122.15, 113.86, 112.84, 112.51, 111.74, 71.94, 56.03, 51.09, 35.89, 24.68, 23.42; **ESIMS:** m/z 335(M+H). **IR** (KBr): 3058, 2821, 1492, 1397, 1213, 1161, 759 cm<sup>-1</sup>; Analysis calculated for C<sub>22</sub>H<sub>26</sub>N<sub>2</sub>O: C, 79.00; H, 7.84; N, 8.38; found: C, 78.89; H, 7.76; N, 8.31%; HRMS (ES): calculated 334.2045; found: 334.2059.

**N-((1H-indol-3-yl)(phenyl)methyl)-N-methylaniline (4l).**

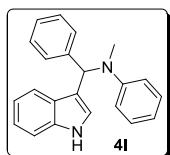

**Brown solid; mp: 145-147 °C; <sup>1</sup>H NMR (200 MHz, CDCl<sub>3</sub>)** δ 2.37 (s, 3H), 5.53 (s, 1H), 6.44 (d, 2H, *J* = 8.1 Hz), 6.75-6.82 (m, 1H), 6.47-7.01 (m, 5H), 7.07-7.18 (m, 4H), 7.28-7.33 (m, 3H), 8.94 (s, 1H); **<sup>13</sup>C, 50 MHz (CDCl<sub>3</sub>):** 149.90, 137.32, 137.28, 129.97, 128.78, 128.53, 128.06, 127.00, 122.88, 122.13, 121.15, 120.14, 119.64, 116.40, 116.34, 113.49, 65.72, 37.62; **ESIMS:** m/z 313 (M+H). **IR** (KBr): 3412, 3358, 2920, 2859, 1609, 1457, 745 cm<sup>-1</sup>; Analysis calculated for C<sub>22</sub>H<sub>20</sub>N<sub>2</sub>: C, 84.58; H, 6.45; N, 8.97; found: C, 84.49; H, 6.37; N, 8.88%; HRMS (ES): calculated 312.1626; found: 312.1632.

**N-((1H-indol-3-yl)(4-nitrophenyl)methyl)-N-methylaniline (4m).**

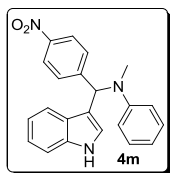

**Brown solid; mp: 67-70 °C; <sup>1</sup>H NMR (200 MHz, CDCl<sub>3</sub>)** δ 2.49 (s, 3H), 5.80 (s, 1H), 6.55 (d, 2H, *J* = 7.7 Hz), 6.86-6.93 (m, 1H), 7.05-7.17 (m, 5H), 7.24-7.27 (m, 1H), 7.39-7.44 (m, 1H), 7.54 (d, 2H, *J* = 8.6 Hz), 8.13 (d, 2H, *J* = 8.8 Hz), 9.05 (s, 1H); **<sup>13</sup>C, 50 MHz (CDCl<sub>3</sub>):** 149.90, 147.43, 146.17, 137.32, 128.55, 128.06, 127.00, 123.75, 122.88, 122.13, 121.15, 120.14, 119.64, 116.40, 116.34, 113.49, 65.72, 37.62; **ESIMS:** m/z 358 (M+H). **IR** (KBr): 3409, 3352, 2929, 2862, 1617, 1460, 759 cm<sup>-1</sup>; Analysis calculated for C<sub>22</sub>H<sub>19</sub>N<sub>3</sub>O<sub>2</sub>: C, 73.93; H, 5.36; N, 11.76; found: C, 73.82; H, 5.24; N, 11.69 %; HRMS (ES): calculated 357.1477; found: 357.1484.

***N*-((5-bromo-1*H*-indol-3-yl)(2-chlorophenyl)methyl)-*N*-methylaniline (4n).**

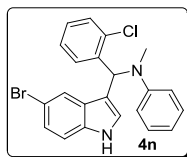

**Brown solid; mp: 137-141 °C; <sup>1</sup>H NMR (200 MHz, CDCl<sub>3</sub>)** δ 2.43 (s, 3H), 5.95 (s, 1H), 6.52 (d, 2H, *J* = 7.8 Hz), 6.80-6.97 (m, 2H), 7.01-7.15 (m, 4H), 7.18-7.40 (m, 4H), 7.64 (s, 1H), 9.85 (s, 1H); **<sup>13</sup>C, 50 MHz (CDCl<sub>3</sub>):** 149.90, 137.67, 136.83, 134.34, 133.07, 130.34, 129.93, 128.06, 127.35, 127.10, 124.28, 123.14, 122.26, 119.64, 116.52, 116.40, 115.69, 115.13, 63.57, 37.62; **ESIMS:** *m/z* 425 (M+H). **IR** (KBr): 3417, 3347, 2925, 2865, 1614, 1445, 751 cm<sup>-1</sup>; Analysis calculated for C<sub>22</sub>H<sub>18</sub>BrClN<sub>2</sub>: C, 62.06; H, 4.26; N, 6.58; found: C, 61.91; H, 4.16; N, 6.51 %; HRMS (ES): calculated 424.0342; found: 424.0353.

***N*-((2-chlorophenyl)(5-methoxy-1*H*-indol-3-yl)methyl)-*N*-methylaniline (4o).**

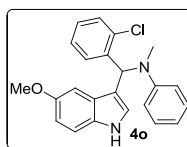

**Brown solid; mp: 133-135 °C; <sup>1</sup>H NMR (200 MHz, CDCl<sub>3</sub>)** δ 2.20 (s, 3H), 3.58 (s, 3H), 5.64 (s, 1H), 6.28 (d, 2H, *J* = 7.6 Hz), 6.52-6.70 (m, 3H), 6.74-6.90 (m, 4H), 6.96-7.07 (m, 3H), 7.12-7.16 (m, 1H), 8.32 (s, 1H); **<sup>13</sup>C, 50 MHz (CDCl<sub>3</sub>):** 153.95, 149.90, 136.83, 134.34, 133.07, 132.49, 130.34, 129.93, 128.06, 127.10, 125.97, 122.26, 119.64, 116.40, 115.69, 113.36, 113.29, 103.83, 63.57, 56.04, 37.62.; **ESIMS:** *m/z* 377 (M+H). **IR** (KBr): 3419, 3368, 2924, 2862, 1613, 1461, 749 cm<sup>-1</sup>; Analysis calculated for C<sub>23</sub>H<sub>21</sub>ClN<sub>2</sub>O: C, 73.30; H, 5.62; N, 7.43; found: C, 73.21; H, 5.55; N, 7.35 %; HRMS (ES): calculated 376.1342; found: 376.1351.

***N*-((2,4-dichlorophenyl)(5-methoxy-1*H*-indol-3-yl)methyl)-*N*-methylaniline (4p).**

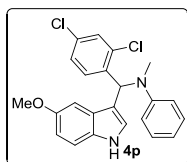

**Brown liquid; <sup>1</sup>H NMR (200 MHz, CDCl<sub>3</sub>)** δ 2.43 (s, 3H), 3.82 (s, 3H), 5.87 (s, 1H), 6.52 (d, 2H, *J* = 7.8 Hz), 6.78-6.93 (m, 3H), 7.03-7.13 (m, 4H), 7.20-7.24 (m, 2H), 7.55 (s, 1H), 8.55 (s, 1H); **<sup>13</sup>C, 50 MHz (CDCl<sub>3</sub>):** 153.95, 149.90, 135.89, 135.46, 135.03, 134.30, 132.49, 130.24, 128.18, 128.06, 125.97, 122.26, 119.64, 116.40, 115.69, 113.36, 113.29, 103.83, 63.57, 56.04, 37.62; **ESIMS:** *m/z* 411 (M+H). **IR** (KBr): 3405, 3348, 2911, 2851, 1616, 1452, 752 cm<sup>-1</sup>; Analysis calculated for C<sub>23</sub>H<sub>20</sub>Cl<sub>2</sub>N<sub>2</sub>O: C, 67.16; H, 4.90; N, 6.81; found: C, 67.07; H, 4.81; N, 6.73 %; HRMS (ES): calculated 410.0953; found: 410.0963.

***N*-((4-chlorophenyl)(1H-indol-3-yl)methyl)-*N*-methylaniline (4q).**

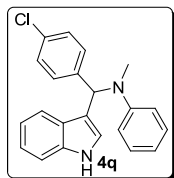

**Brown solid; mp: 135-137 °C; <sup>1</sup>H NMR (200 MHz, CDCl<sub>3</sub>)** δ 2.52 (s, 3H), 6.07 (s, 1H), 6.44 (d, 2H, *J* = 7.0 Hz), 6.86-6.98 (m, 1H), 7.01-7.18 (m, 4H), 7.26-7.43 (m, 7H), 7.83 (d, 1H, *J* = 7.5 Hz); **<sup>13</sup>C, 50 MHz (CDCl<sub>3</sub>):** 149.90, 137.32, 136.48, 133.44, 131.14, 129.04, 128.06, 127.00, 122.88, 122.13, 121.15, 120.14, 119.64, 116.40, 116.34, 113.49, 65.72, 37.62; **ESIMS:** *m/z* 347 (M+H). **IR (KBr):** 3416, 3363, 2927, 2867, 1601, 1463, 757 cm<sup>-1</sup>; Analysis calculated for C<sub>22</sub>H<sub>19</sub>ClN<sub>2</sub>: C, 76.18; H, 5.52; N, 8.08; found: C, 76.07; H, 5.43; N, 8.01 %; **HRMS (ES):** calculated 346.1237; found: 346.1245.

***N*-((5-bromo-1H-indol-3-yl)(naphthalen-1-yl)methyl)-*N*-methylaniline (4r).**

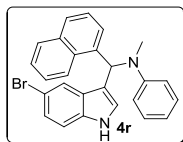

**Brown solid; mp: 82-85 °C; <sup>1</sup>H NMR (200 MHz, CDCl<sub>3</sub>)** δ 2.48 (s, 3H), 6.19 (s, 1H), 6.49 (d, 2H, *J* = 7.8 Hz), 6.96-7.09 (m, 4 H), 7.22-7.42 (m, 4H), 7.45-7.60 (m, 2 H), 7.68-7.79 (m, 2 H), 8.12 (d, 1H, *J* = 8.20 Hz), 9.64 (s, 1H); **<sup>13</sup>C, 50 MHz (CDCl<sub>3</sub>):** 149.90, 137.67, 134.40, 132.56, 131.92, 130.44, 128.84, 128.06, 127.86, 127.35, 127.26, 126.75, 126.70, 126.59, 124.28, 123.59, 123.14, 119.64, 116.52, 116.40, 115.64, 115.13, 63.28, 37.62; **ESIMS:** *m/z* 441 (M+H). **IR (KBr):** 3418, 3353, 2914, 2869, 1617, 1459, 755 cm<sup>-1</sup>; Analysis calculated for C<sub>26</sub>H<sub>21</sub>BrN<sub>2</sub>: C, 70.75; H, 4.80; N, 6.35; found: C, 70.69; H, 4.71; N, 6.21 %; **HRMS (ES):** calculated 440.0888; found: 440.0897.

***N*-((2-bromophenyl)(1H-indol-3-yl)methyl)-*N*-methylaniline (4s).**

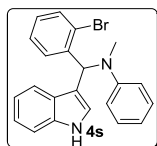

**Brown solid; mp: 131-133 °C; <sup>1</sup>H NMR (200 MHz, CDCl<sub>3</sub>)** δ 2.49 (s, 3H), 5.56 (s, 1H), 6.55 (d, 2H, *J* = 7.6 Hz), 6.83-6.93 (m, 3H), 7.05-7.17 (m, 5H), 7.24-7.31 (m, 3H), 7.39-7.44 (m, 1H), 9.05 (s, 1H); **<sup>13</sup>C, 50 MHz (CDCl<sub>3</sub>):** 149.90, 137.32, 135.24, 133.45, 133.31, 129.49, 128.06, 128.04, 127.00, 124.27, 123.13, 122.13, 121.15, 120.14, 119.64, 116.40, 116.34, 113.49, 65.66, 37.62; **ESIMS:** *m/z* 391 (M+H). **IR (KBr):** 3417, 3349, 2912, 2857, 1618, 1451, 743 cm<sup>-1</sup>; Analysis calculated for C<sub>22</sub>H<sub>19</sub>BrN<sub>2</sub>: C, 67.53; H, 4.89; N, 7.16; found: C, 67.41; H, 4.78; N, 7.06 %; **HRMS (ES):** calculated 390.0732; found: 390.0741.

***N*-((4-fluorophenyl)(1*H*-indol-3-yl)methyl)-*N*-methylaniline (**4t**).**

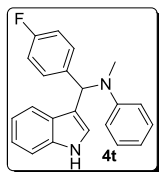

**Brown liquid;**  $^1\text{H}$  NMR (200 MHz,  $\text{CDCl}_3$ )  $\delta$  2.39 (s, 3H), 5.46 (s, 1H), 6.45 (d, 2H,  $J = 7.8$  Hz), 6.73-6.8 (m, 3H), 6.95-7.07 (m, 5H), 7.14-7.21 (m, 3H), 7.29-7.34 (m, 1H), 8.95 (s, 1H).;  $^{13}\text{C}$ , 50 MHz ( $\text{CDCl}_3$ ): 162.78, 149.90, 137.32, 133.93, 131.41, 128.06, 127.00, 122.88, 122.13, 121.15, 120.14, 119.64, 116.40, 116.34, 114.71, 113.49, 65.72, 37.62.; **ESIMS:**  $m/z$  331 (M+H). **IR** (KBr): 3404, 3353, 2914, 2851, 1619, 1447, 754  $\text{cm}^{-1}$ ; Analysis calculated for  $\text{C}_{22}\text{H}_{19}\text{FN}_2$ : C, 79.97; H, 5.80; N, 8.48; found: C, 79.89; H, 5.73; N, 8.35%; HRMS (ES): calculated 330.1532; found: 330.1545.

***N*-methyl-*N*-((1-methyl-1*H*-indol-3-yl)(*p*-tolyl)methyl)aniline (**4u**).**

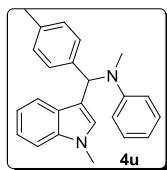

**Brown liquid;**  $^1\text{H}$  NMR (200 MHz,  $\text{CDCl}_3$ )  $\delta$  2.29 (s, 3H), 2.42 (s, 3H), 3.84 (s, 3H), 5.63 (s, 1H), 6.54 (d, 2H  $J = 7.7$  Hz), 6.86-6.94 (m, 1H), 6.99-7.11 (m, 6H), 7.15-7.24 (m, 4H), 7.43 (d, 1H,  $J = 6.9$  Hz);  $^{13}\text{C}$ , 50 MHz ( $\text{CDCl}_3$ ): 149.90, 139.88, 137.16, 137.07, 135.44, 130.97, 130.06, 129.49, 128.06, 124.77, 122.87, 122.16, 119.64, 116.40, 112.52, 108.08, 65.21, 37.62, 35.89, 21.13; **ESIMS:**  $m/z$  341 (M+H). **IR** (KBr): 3048, 2881, 2948, 2782, 1399, 1219, 751  $\text{cm}^{-1}$ ; Analysis calculated for  $\text{C}_{24}\text{H}_{24}\text{N}_2$ : C, 84.67; H, 7.11; N, 8.23; found: C, 84.72; H, 7.21; N, 8.05%; HRMS (ES): calculated 340.1939; found: 340.1942.

***N*-(cyclohexyl(1*H*-indol-3-yl)methyl)-*N*-methylaniline (**4v**).**

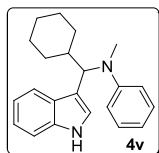

**Brown solid; mp: 110-113  $^{\circ}\text{C}$ ;**  $^1\text{H}$  NMR (200 MHz,  $\text{CDCl}_3$ )  $\delta$  1.29-1.35 (m, 6H), 1.42-1.44 (m, 4H), 2.57 (s, 4H), 4.35 (d, 1H,  $J = 11.0$  Hz), 6.55 (d, 2H,  $J = 7.7$  Hz), 6.84-6.92 (m, 1H), 7.01-7.09 (m, 4H), 7.27-7.35 (m, 2H), 7.63-7.67 (m, 1H), 8.81 (s, 1H);  $^{13}\text{C}$ , 50 MHz ( $\text{CDCl}_3$ ): 149.43, 136.88, 128.22, 126.47, 121.58, 121.01, 120.86, 119.97, 119.30, 119.29, 116.23, 113.42, 60.49, 39.06, 38.80, 29.78, 25.92, 25.57; **ESIMS:**  $m/z$  319 (M+H). **IR** (KBr): 3435, 3058, 2929, 2839, 1609, 1563, 1461, 747  $\text{cm}^{-1}$ ; Analysis calculated for  $\text{C}_{22}\text{H}_{26}\text{N}_2$ : C, 82.97; H, 8.23; N, 8.80; found: C, 82.88; H, 8.35; N, 8.75 %; HRMS (ES): calculated 318.2096; found: 318.2104.

***N*-(1-(1*H*-indol-3-yl)propyl)-*N*-methylaniline (4w).**

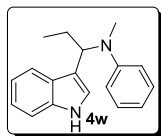

**Brown liquid;**  $^1\text{H}$  NMR (200 MHz,  $\text{CDCl}_3$ )  $\delta$  1.09 (t, 3H,  $J = 7.2$  Hz), 2.00 (m, 2H), 2.77 (s, 3H), 4.70 (t, 1H,  $J = 7.0$  Hz), 6.77 (d, 2H,  $J = 7.6$  Hz), 6.93-7.00 (m, 1H), 7.13-7.27 (m, 5H), 7.39-7.44 (m, 1H), 7.73-7.78 (m, 1H), 8.54 (s, 1H);  $^{13}\text{C}$ , 50 MHz ( $\text{CDCl}_3$ ): 149.01, 136.53, 128.46, 126.01, 122.54, 121.16, 120.91, 119.84, 119.24, 118.97, 116.10, 113.37, 55.74, 37.79, 25.45, 12.09; **ESIMS:**  $m/z$  265 (M+H). **IR** (KBr): 3442, 3051, 2934, 2843, 1601, 1569, 1454, 756  $\text{cm}^{-1}$ ; Analysis calculated for  $\text{C}_{18}\text{H}_{20}\text{N}_2$ : C, 81.78; H, 7.63; N, 10.60; found: C, 81.70; H, 7.67; N, 10.61%; HRMS (ES): calculated 264.1626; found: 264.1635.

***N*-((4-chlorophenyl)(1*H*-indol-3-yl)methyl)-*N*-ethylaniline (4x).**

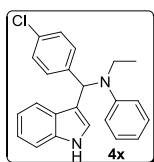

**Brown liquid;**  $^1\text{H}$  NMR (200 MHz,  $\text{CDCl}_3$ )  $\delta$  1.09 (t, 3H,  $J = 6.7$  Hz), 3.06 (q, 2H,  $J = 6.9$  Hz), 5.61 (s, 1H), 6.42 (d, 2H,  $J = 7.8$  Hz), 6.78-6.86 (m, 1H), 6.92-7.04 (m, 4H), 7.08-7.26 (m, 6H), 7.36-7.41 (m, 1H), 9.51 (s, 1H);  $^{13}\text{C}$ , 50 MHz ( $\text{CDCl}_3$ ): 148.68, 137.32, 136.48, 133.37, 131.26, 128.98, 128.04, 127.00, 122.64, 122.13, 121.15, 120.14, 119.72, 118.75, 115.68, 113.49, 63.33, 45.18, 14.42; **ESIMS:**  $m/z$  361 (M+H). **IR** (KBr): 3438, 3058, 2857, 1885, 1619, 1521, 1461, 741  $\text{cm}^{-1}$ ; Analysis calculated for  $\text{C}_{23}\text{H}_{21}\text{ClN}_2$ : C, 76.55; H, 5.87; N, 7.76; found: C, 76.48; H, 5.79; N, 7.69 %; HRMS (ES): calculated 360.1393; found: 360.1397.

***N*-((2-chlorophenyl)(1*H*-indol-3-yl)methyl)-*N*-ethylaniline (4y).**

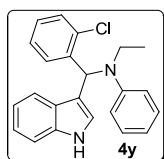

**Brown liquid;**  $^1\text{H}$  NMR (200 MHz,  $\text{CDCl}_3$ )  $\delta$  1.09 (t, 3H,  $J = 6.9$  Hz), 3.14 (q, 2H,  $J = 6.8$  Hz), 5.72 (s, 1H), 6.34 (d, 2H,  $J = 7.5$  Hz), 6.74-6.84 (m, 2H), 6.88-7.09 (m, 6H), 7.12-7.24 (m, 3H), 7.41-7.46 (m, 1H), 9.57 (s, 1H);  $^{13}\text{C}$ , 50 MHz ( $\text{CDCl}_3$ ): 148.68, 137.32, 136.89, 134.33, 132.99, 130.34, 129.82, 128.04, 128.04, 127.01, 127.00, 122.86, 122.13, 121.15, 120.14, 119.72, 118.75, 115.66, 113.49, 61.20, 45.18, 14.42; **ESIMS:**  $m/z$  361 (M+H). **IR** (KBr): 3422, 3058, 2921, 1706, 1597, 1443, 1261, 754  $\text{cm}^{-1}$ ; Analysis calculated for  $\text{C}_{23}\text{H}_{21}\text{ClN}_2$ : C, 76.55; H, 5.87; N, 7.76; found: C, 76.43; H, 5.73; N, 7.61%; HRMS (ES): calculated 360.1393; found: 360.1399.

**2-(Phenyl(piperidin-1-yl)methyl)-1H-indole (5a).**

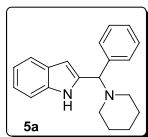

**Colourless liquid:**  $^1\text{H}$  NMR (200 MHz,  $\text{CDCl}_3$ )  $\delta$  1.54-1.59 (m, 6H), 2.44-2.49 (m, 4H), 6.01 (s, 1H), 6.54 (d, 1H,  $J=3.2$  Hz), 7.05-7.18 (m, 2H), 7.20-7.29 (m, 4H), 7.30-7.37 (m, 2H), 7.38-7.60 (m, 1H), 7.61-7.65 (m, 1H);  $^{13}\text{C}$  NMR (50 MHz,  $\text{CDCl}_3$ ): 138.87, 137.02, 128.45, 127.97, 127.64, 126.57, 121.38, 120.81, 119.50, 110.09, 101.68, 78.92, 51.19, 26.11, 24.44. ; **ESIMS:**  $m/z$  391 (M+H). **IR** (KBr): 3439, 3048, 2928, 1701, 1597, 1437, 1254, 751  $\text{cm}^{-1}$ .

**2-(Phenyl(pyrrolidin-1-yl)methyl)-1H-indole (5e).**

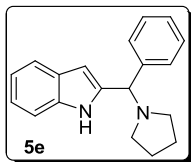

**Colourless liquid:**  $^1\text{H}$  NMR (200 MHz,  $\text{CDCl}_3$ )  $\delta$  1.32-1.38 (m, 4H), 2.37-2.41 (m, 4H), 5.93 (s, 1H), 6.47 (d, 1H,  $J=3.1$  Hz), 7.00-7.11 (m, 3H), 7.14-7.28 (m, 6H), 7.39 (d, 1H,  $J=7.8$  Hz), 7.58 (d, 1H,  $J=6.9$  Hz);  $^{13}\text{C}$  NMR (50 MHz,  $\text{CDCl}_3$ ): 138.19, 136.60, 135.34, 129.76, 128.60, 128.37, 128.05, 122.02, 121.48, 120.74, 111.96, 100.13, 75.50, 54.12, 24.76; **ESIMS:**  $m/z$  277 (M+H). **IR** (KBr): 3442, 3041, 2928, 1714, 1587, 1435, 1248, 747  $\text{cm}^{-1}$ .

**1-(1H-indol-2-yl)-N,N-dimethyl-1-phenylmethanamine (5g).**

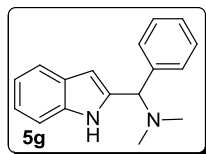

**Colourless liquid:**  $^1\text{H}$  NMR (300 MHz,  $\text{CDCl}_3$ )  $\delta$  2.18 (s, 6H), 5.74 (s, 1H), 6.98 (d, 1H,  $J=3.0$  Hz), 6.98-7.03 (m, 1H), 7.07-7.11 (m, 1H), 7.12-7.21 (m, 4H), 7.23-7.34 (m, 2H), 7.41 (d, 1H,  $J=8.1$  Hz), 7.51 (d, 1H,  $J=7.5$  Hz);  $^{13}\text{C}$  NMR (75 MHz,  $\text{CDCl}_3$ ): 139.03, 136.79, 128.53, 128.46, 128.17, 127.52, 126.04, 121.49, 120.87, 119.58, 109.91, 102.14, 79.42, 42.40. ; **ESIMS:**  $m/z$  251 (M+H); **IR** (KBr): 3442, 3055, 2814, 1489, 1391, 1232, 1169, 751  $\text{cm}^{-1}$ .

mkg-4a

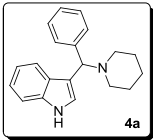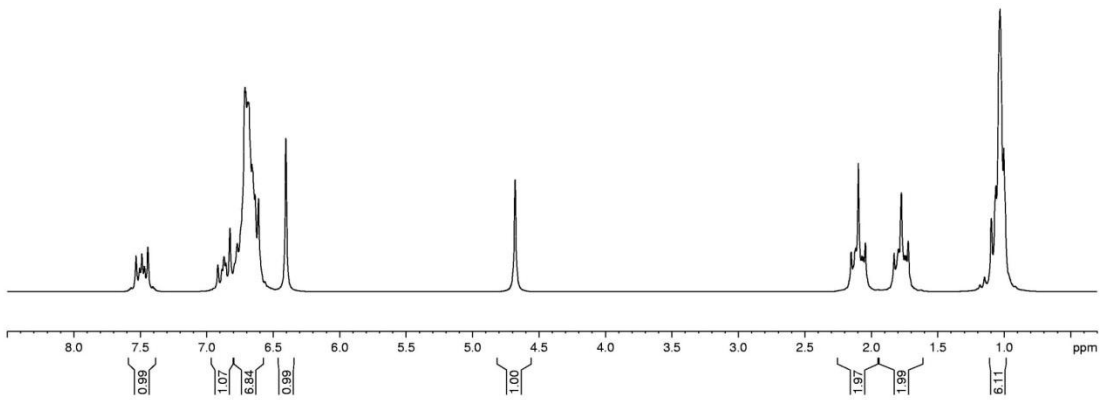

SHAIL-11

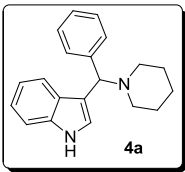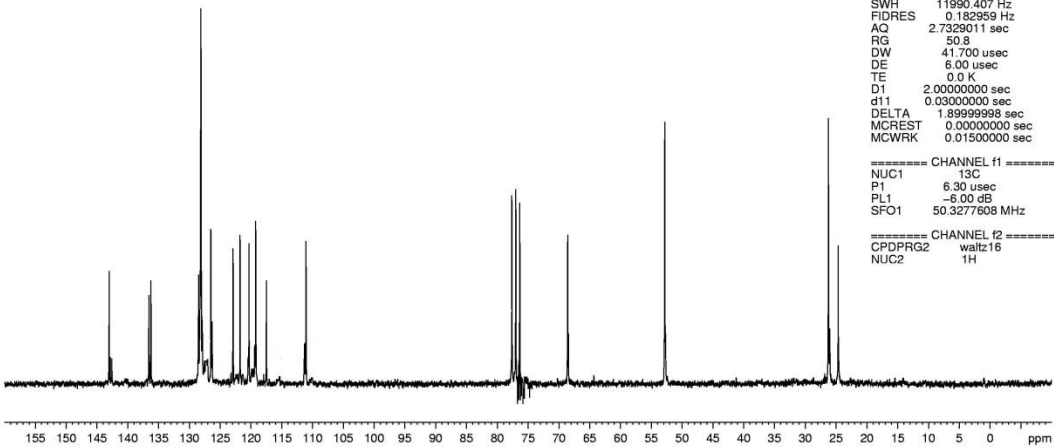

Current Data Parameters  
NAME 19may2011  
EXPNO 100  
PROCNO 1

F2 - Acquisition Parameters  
Date\_ 20110520  
Time 13.53  
INSTRUM spect  
PROBHD 5 mm Dual 13C/  
PULPROG zgpg30  
TD 65536  
SOLVENT CDCl3  
NS 906  
DS 4  
SWH 11990.407 Hz  
FIDRES 0.182959 Hz  
AQ 2.7329011 sec  
RG 50.8  
DW 41.700 usec  
DE 6.00 usec  
TE 0.0 K  
D1 2.00000000 sec  
d11 0.03000000 sec  
DELTA 1.89999998 sec  
MCREST 0.00000000 sec  
MCWRK 0.01500000 sec

===== CHANNEL f1 =====  
NUC1 13C  
P1 6.30 usec  
PL1 -6.00 dB  
SFO1 50.3277608 MHz

===== CHANNEL f2 =====  
CPDPRG2 waltz16  
NUC2 1H

shail-9

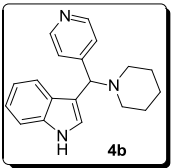

Current Data Parameters  
NAME 2may2011  
EXPNO 360  
PROCNO 1  
  
F2 - Acquisition Parameters  
Date\_ 20110503  
Time 1.20  
INSTRUM spect  
PROBHD 5 mm QNP 1H/13  
PULPROG zg30  
TD 65536  
SOLVENT CDCl3  
NS 8  
DS 0  
SWH 6188.119 Hz  
FIDRES 0.094423 Hz  
AQ 5.2953587 sec  
RG 80.6  
DW 80.800 usec  
DE 6.00 usec  
TE 300.0 K  
D1 1.00000000 sec  
TD0 1

===== CHANNEL f1 =====  
NUC1 1H  
P1 11.60 usec  
PL1 -1.00 dB  
SFO1 300.1318534 MHz  
  
F2 - Processing parameters  
SI 32768

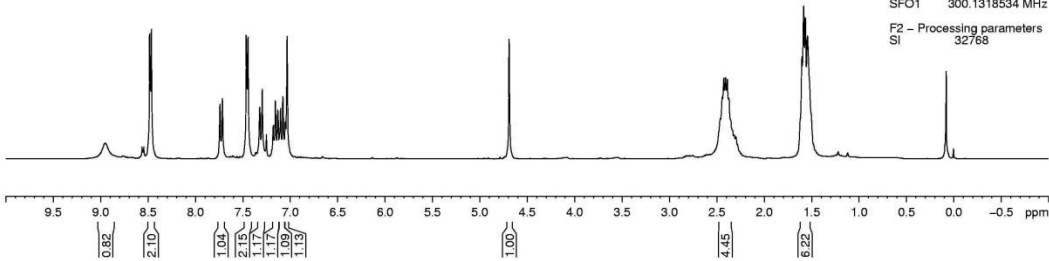

SHAIL-9

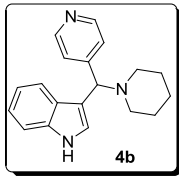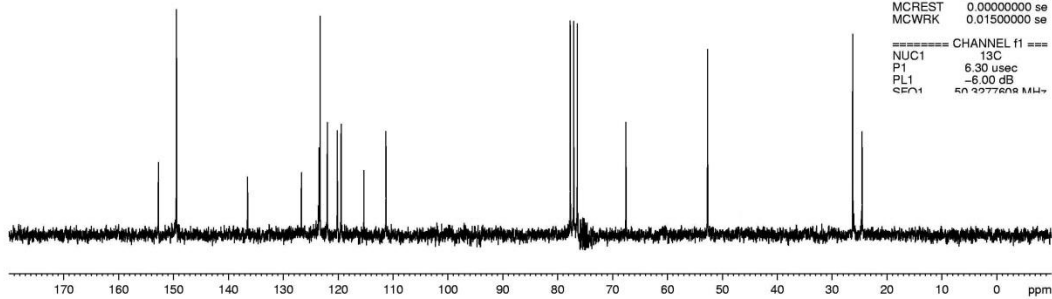

Current Data Parameters  
NAME 4may2011  
EXPNO 150  
PROCNO 1

F2 - Acquisition Parameters  
Date\_ 20110506  
Time 9.33  
INSTRUM spect  
PROBHD 5 mm Dual 13C/  
PULPROG zgpg30  
TD 65536  
SOLVENT CDCl3  
NS 255  
DS 4  
SWH 11990.407 Hz  
FIDRES 0.182959 Hz  
AQ 2.7329011 sec  
RG 71.8  
DW 41.700 usec  
DE 6.00 usec  
TE 0.0 K  
D1 2.00000000 sec  
d11 0.03000000 sec  
DELTA 1.89999998 sec  
MCREST 0.00000000 se  
MCWRK 0.01500000 se

===== CHANNEL f1 =====  
NUC1 13C  
P1 6.30 usec  
PL1 -6.00 dB  
SFO1 101.2577600 MHz

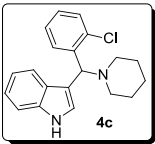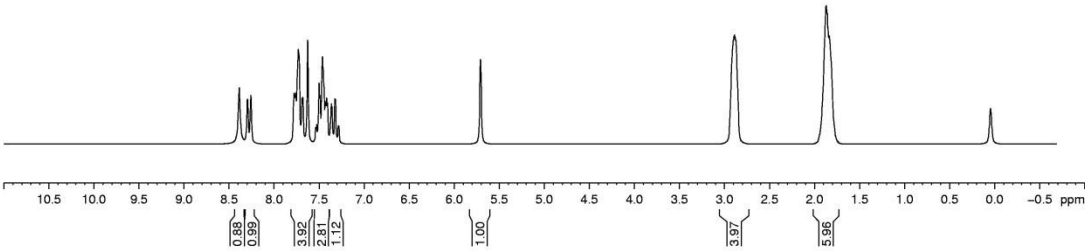

mkg-12d

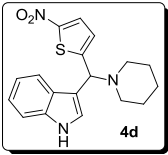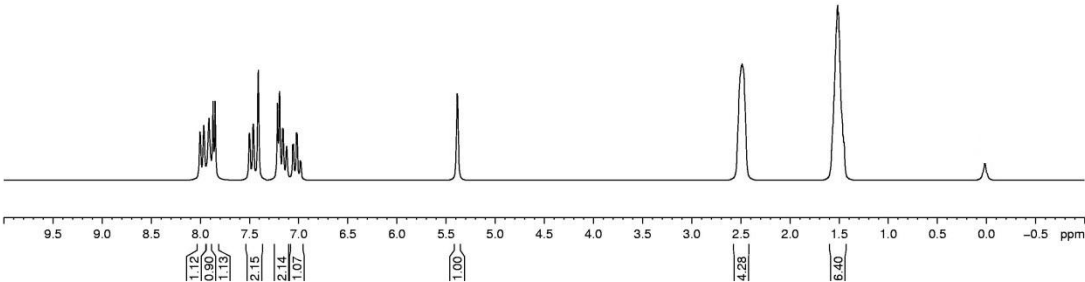

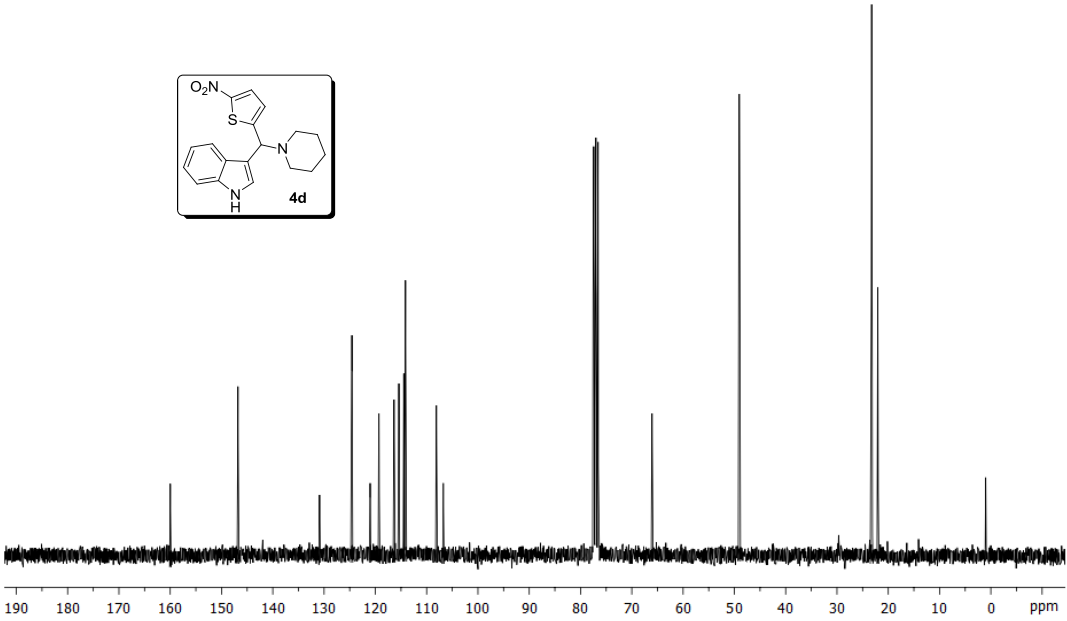

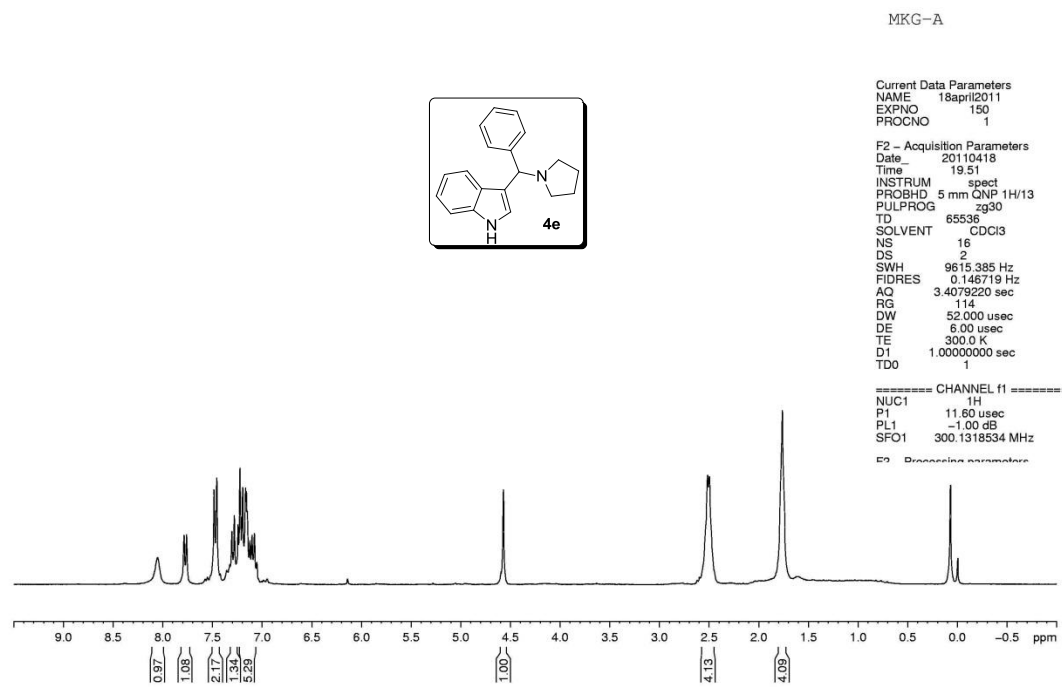

MKG-A

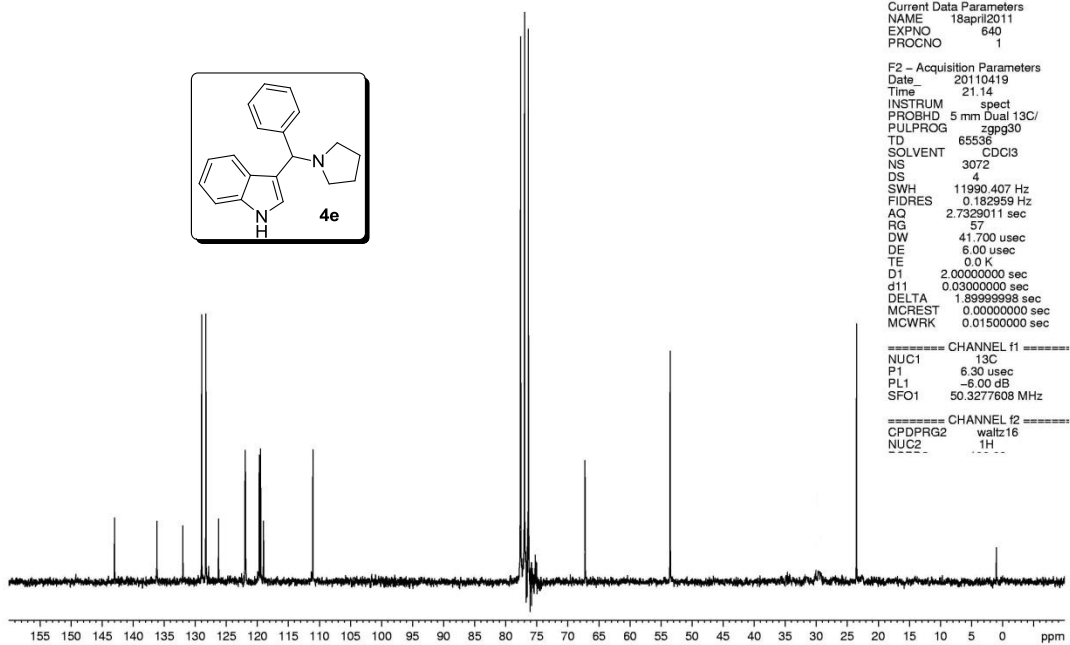

Current Data Parameters  
NAME 18april2011  
EXPNO 640  
PROCNO 1

F2 - Acquisition Parameters  
Date\_ 20110419  
Time 21.14  
INSTRUM spect  
PROBHD 5 mm Dual 13C/  
PULPROG zgpg30  
TD 65536  
SOLVENT CDCl3  
NS 3072  
DS 4  
SWH 11990.407 Hz  
FIDRES 0.182959 Hz  
AQ 2.7329011 sec  
RG 57  
DW 41.700 usec  
DE 6.00 usec  
TE 0.0 K  
D1 2.00000000 sec  
d11 0.03000000 sec  
DELTA 1.89999998 sec  
MCREST 0.00000000 sec  
MCWRK 0.01500000 sec

===== CHANNEL f1 =====  
NUC1 13C  
P1 6.30 usec  
PL1 -6.00 dB  
SFO1 50.3277608 MHz

===== CHANNEL f2 =====  
CPDPRG2 waltz16  
NUC2 1H

mkg-12f

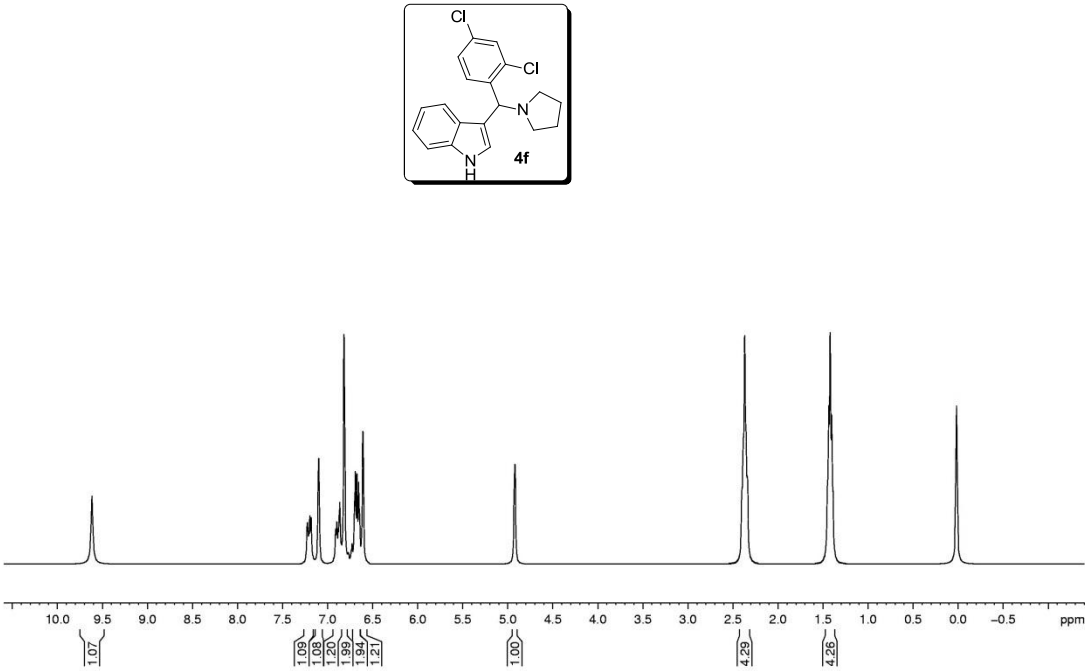

mkg-12g

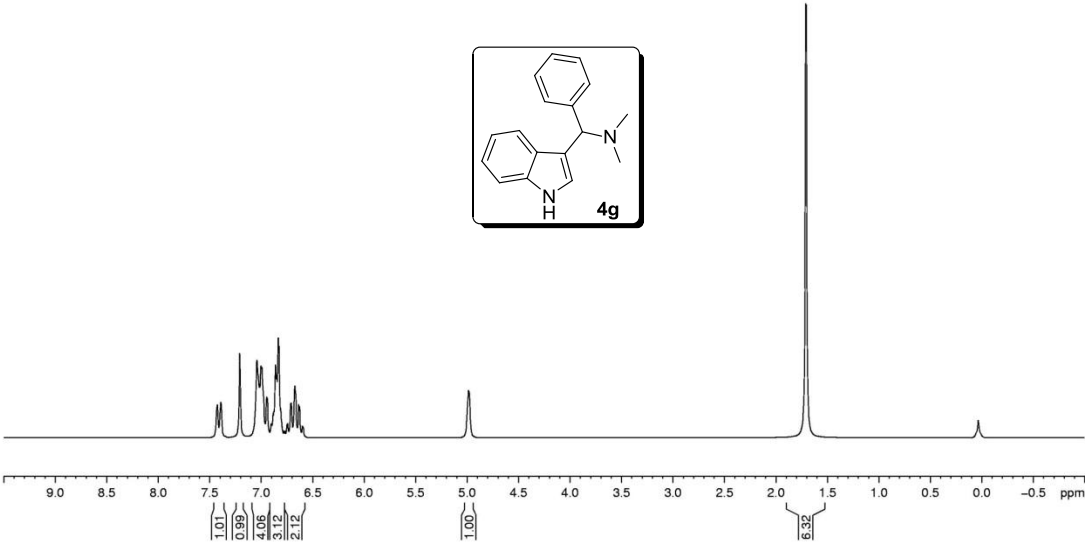

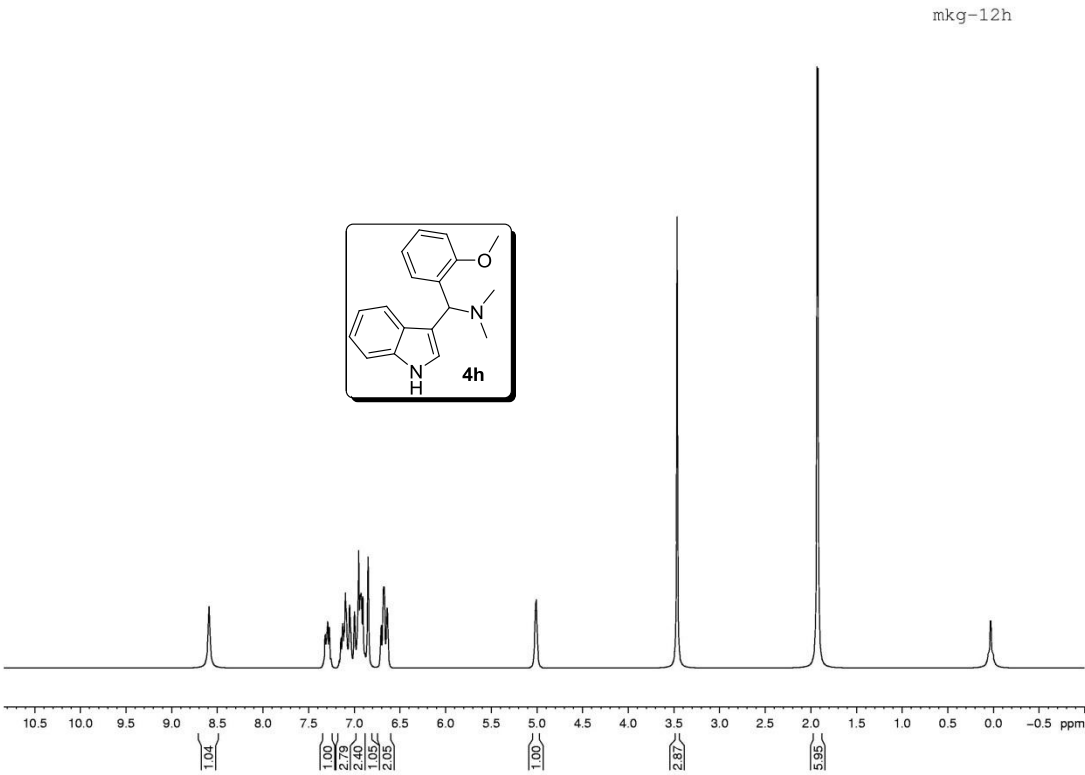

mkq-12i

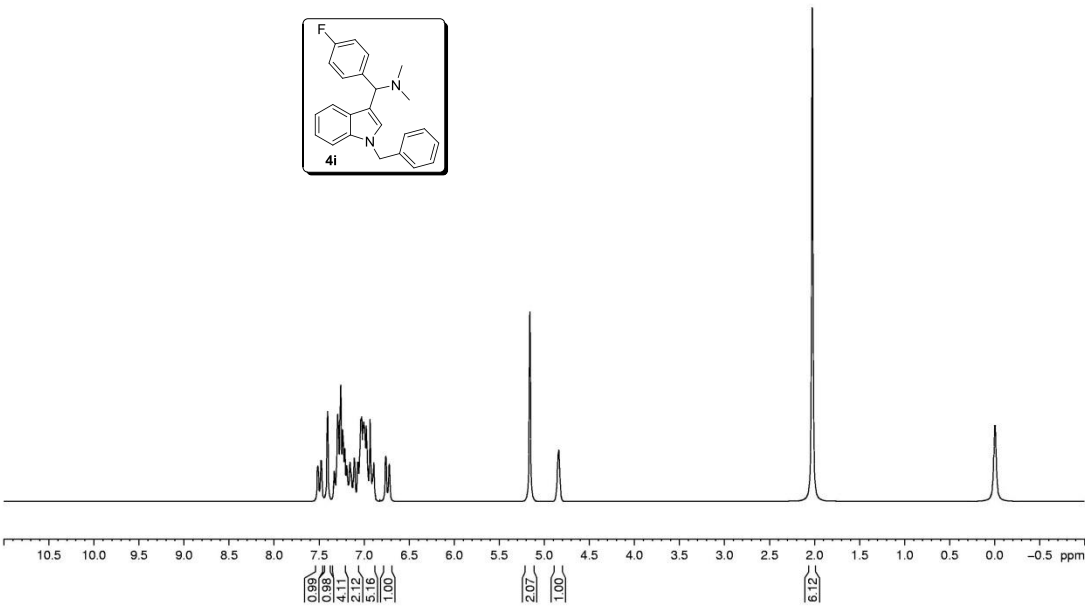

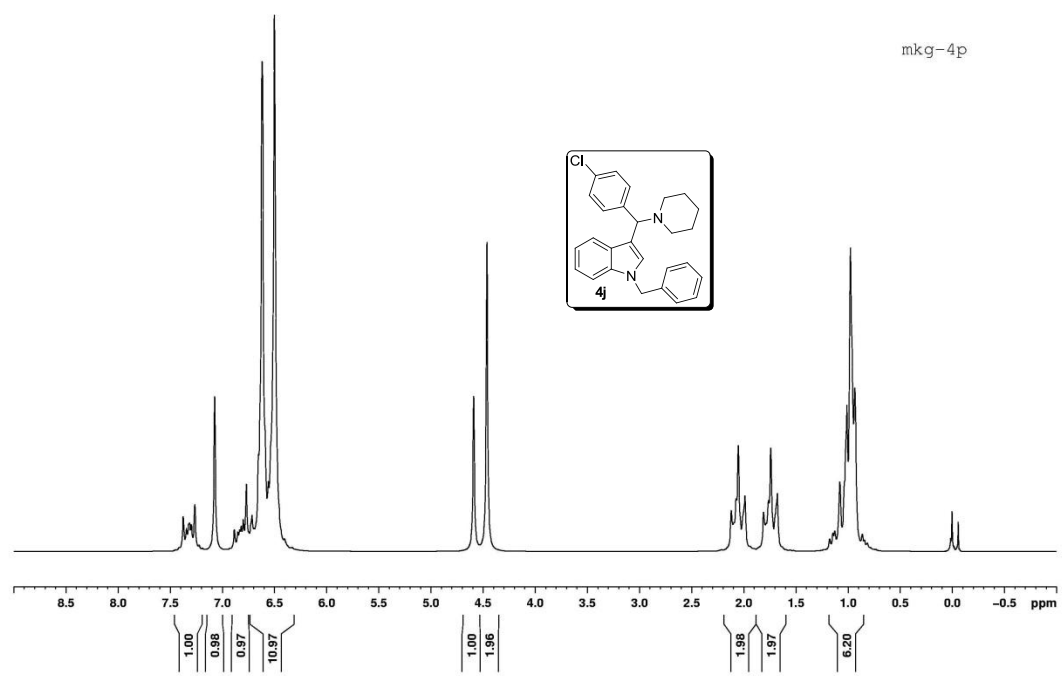

mkg-4o

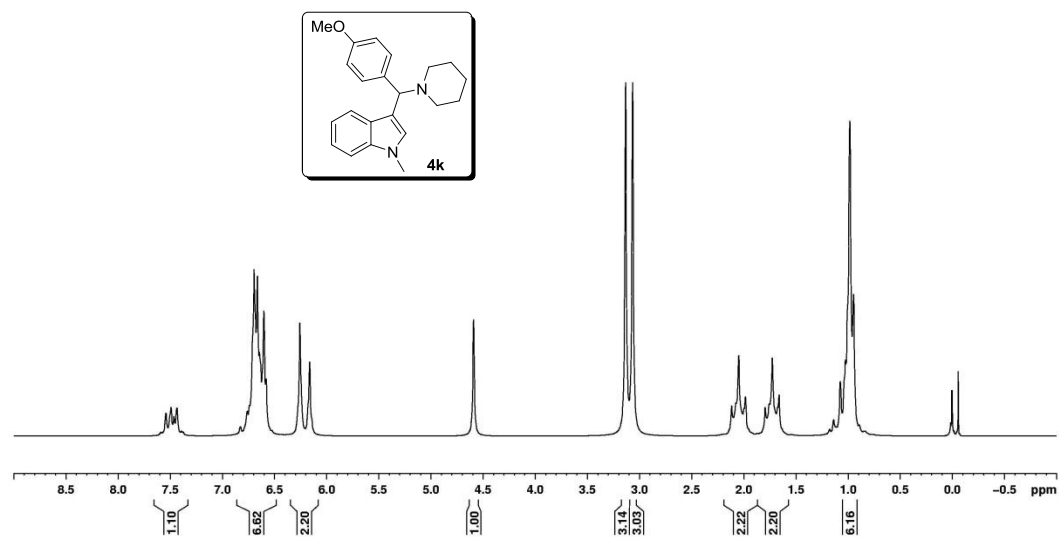

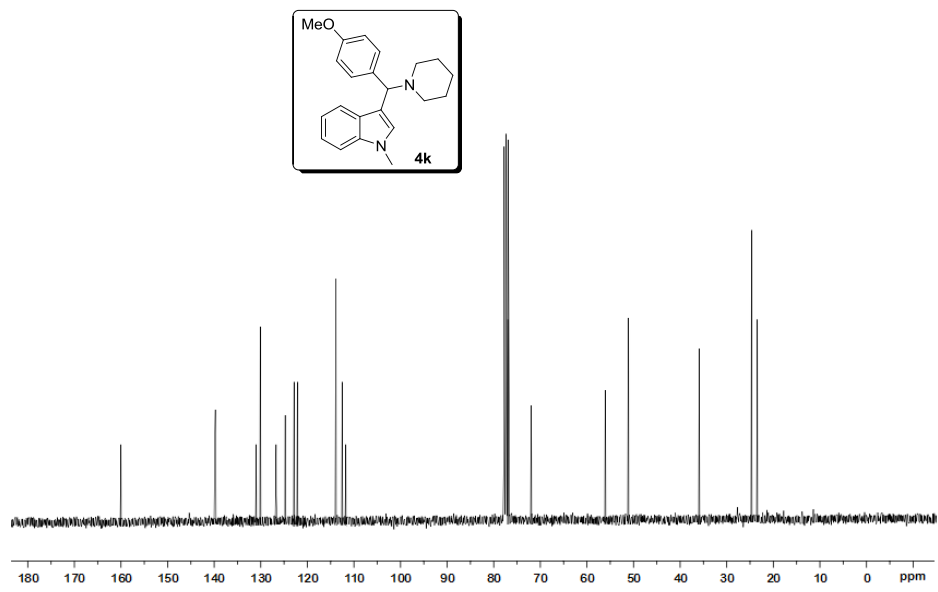

mkg-121

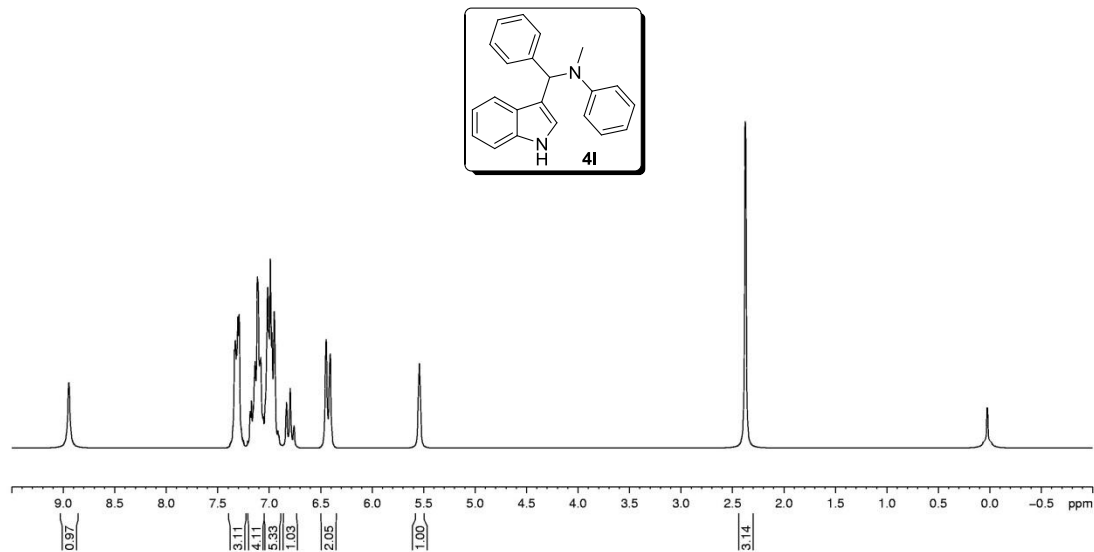

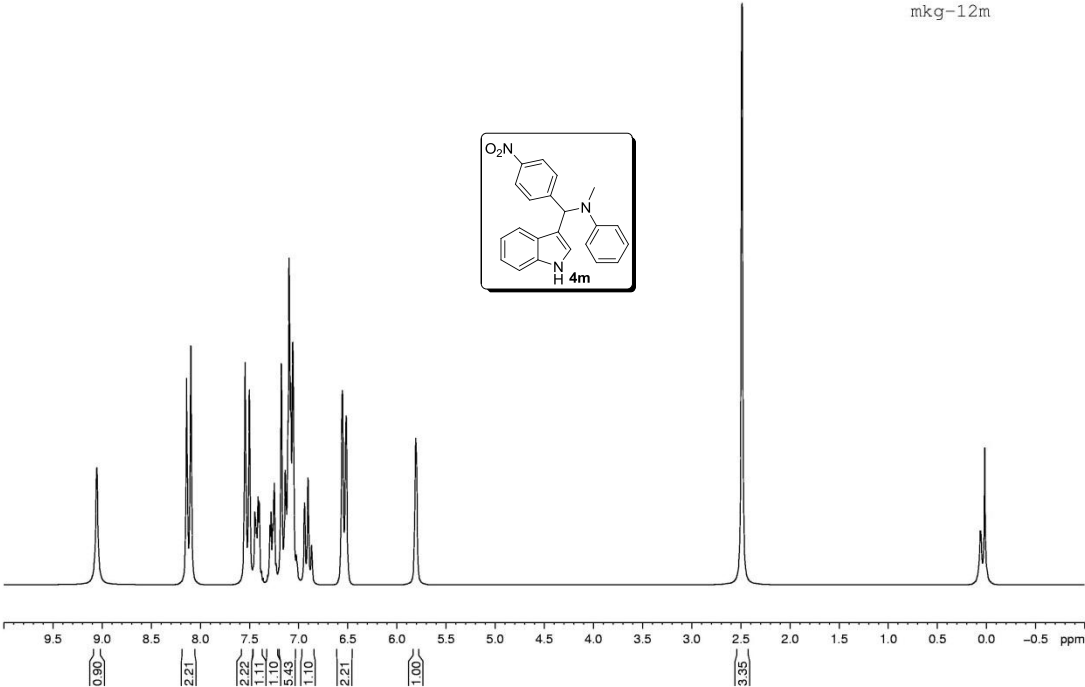

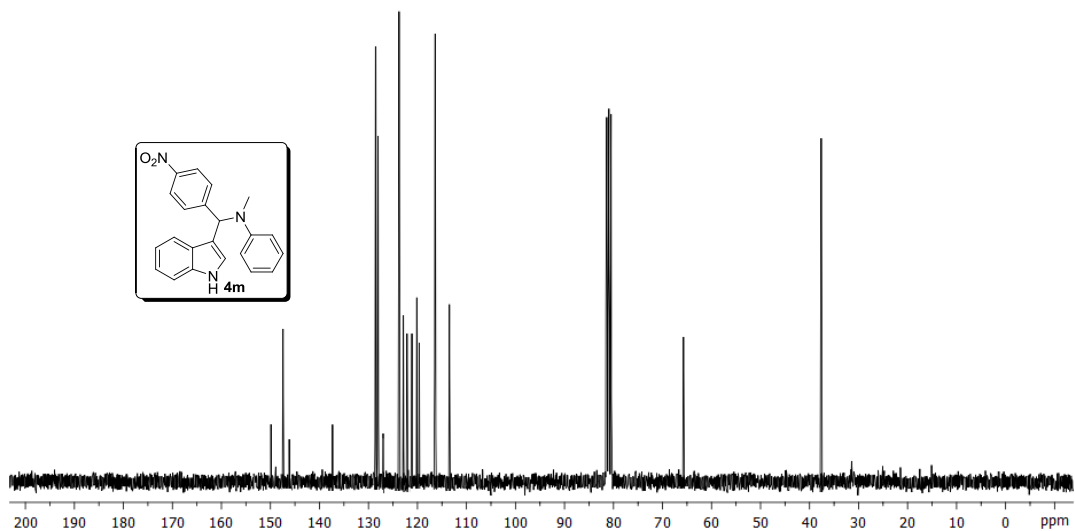

mkg-12n

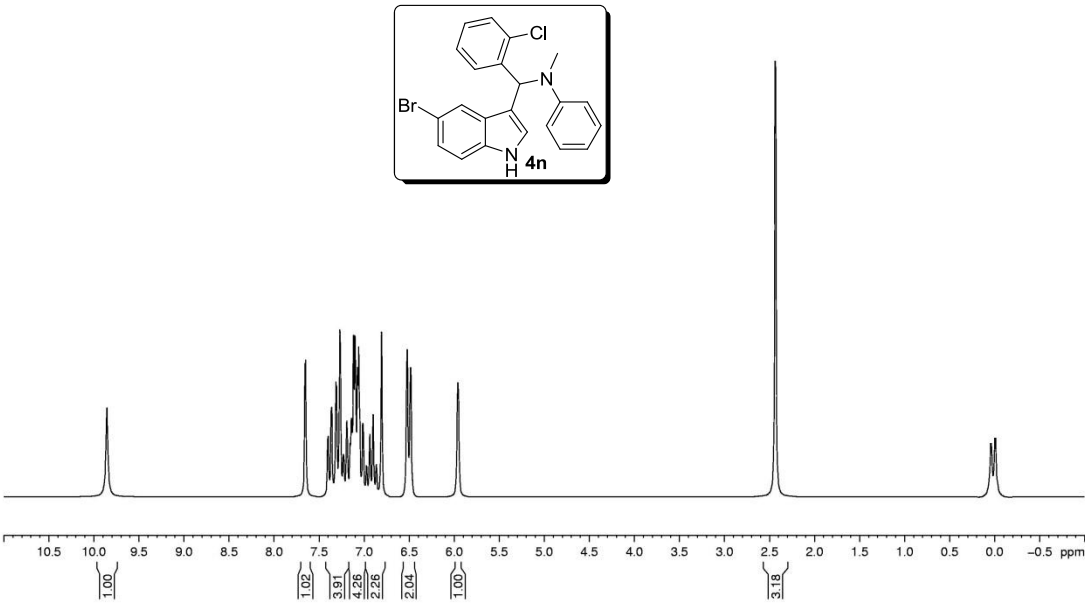

mkg-12o

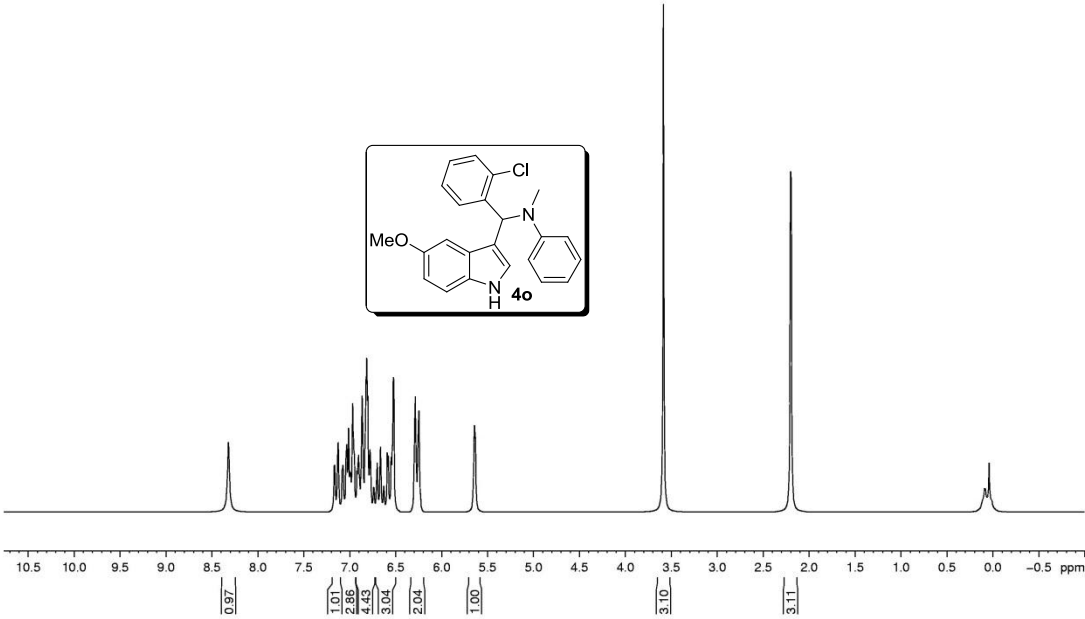

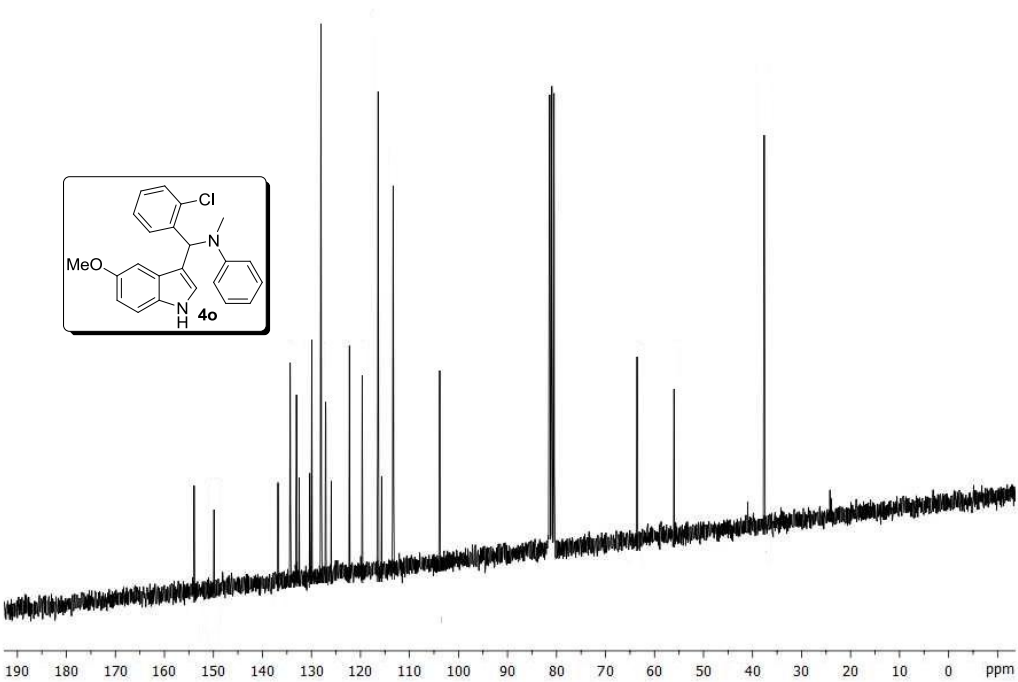

mkg-12p

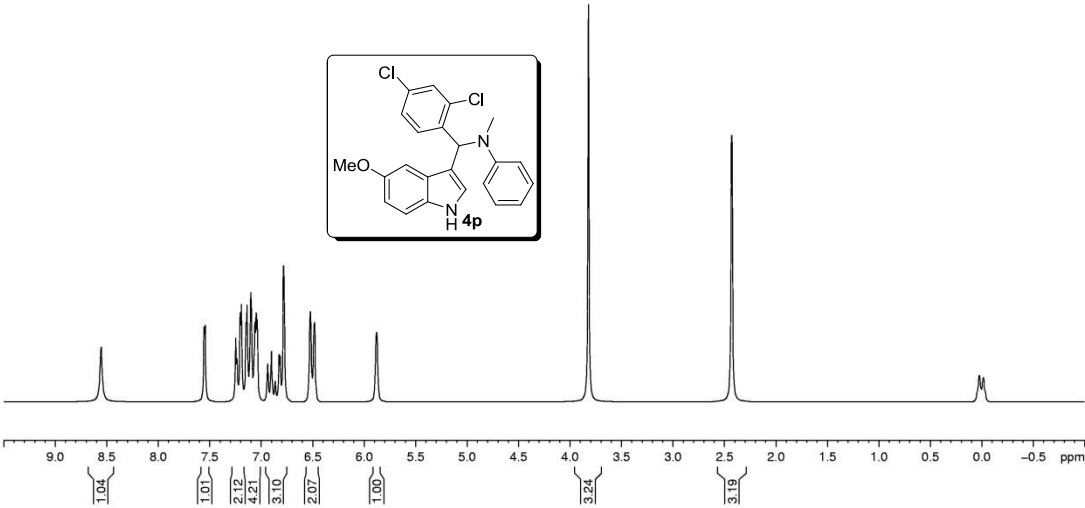

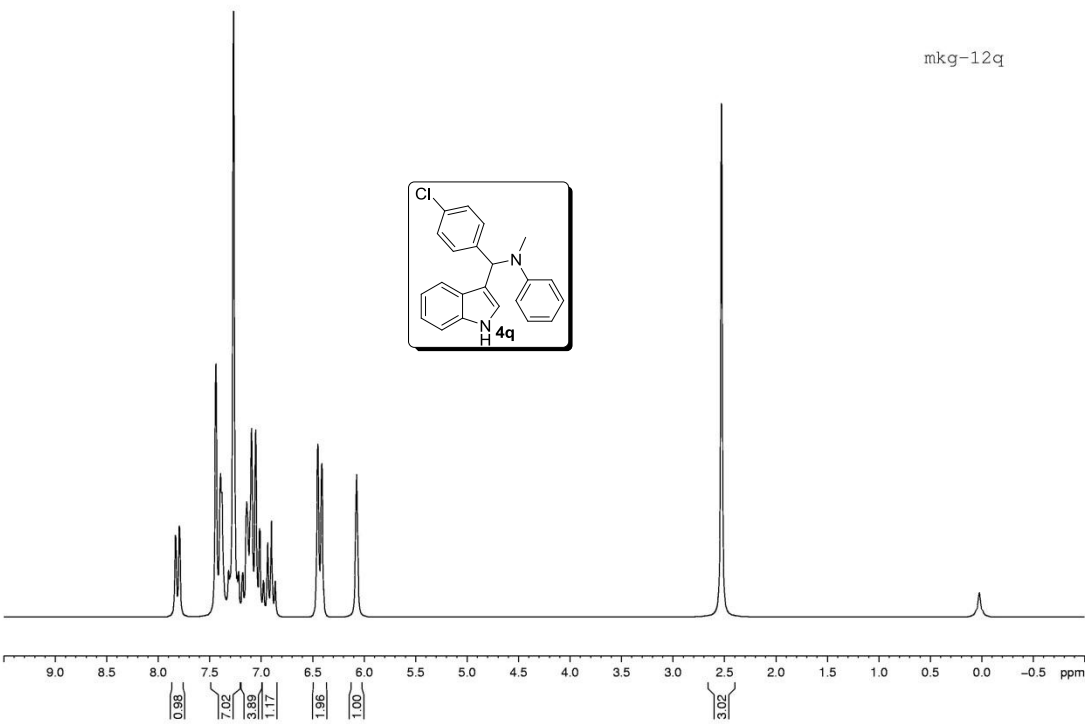

mk9-12r

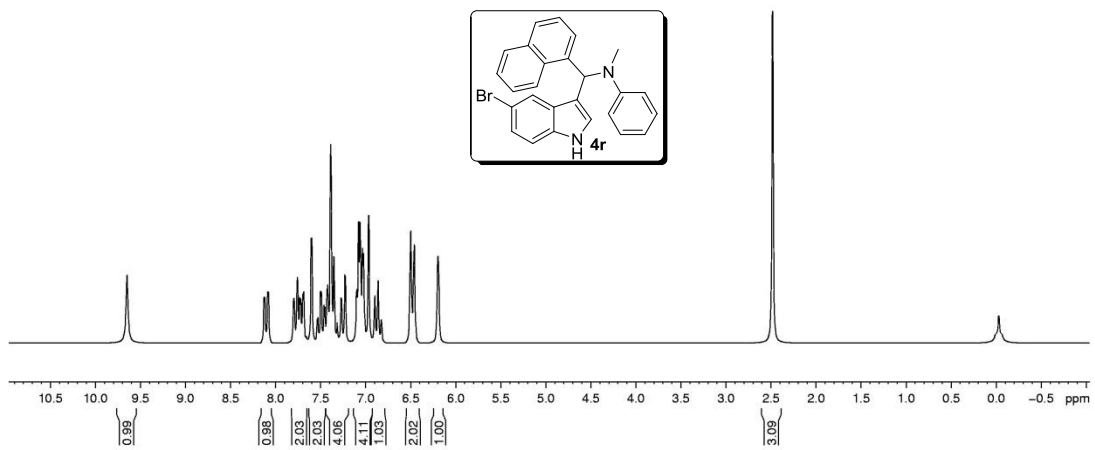

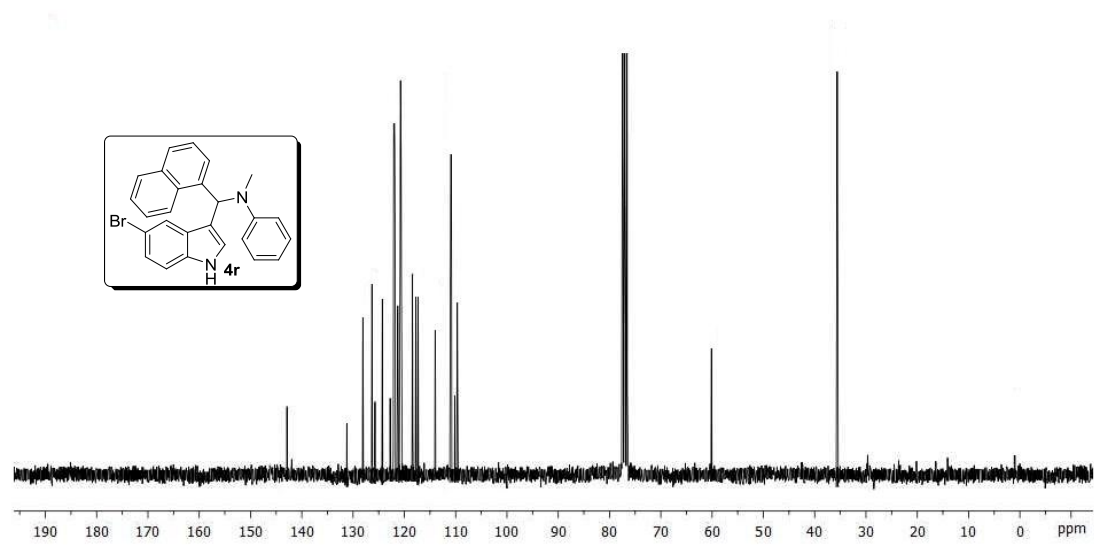

mkg-12s

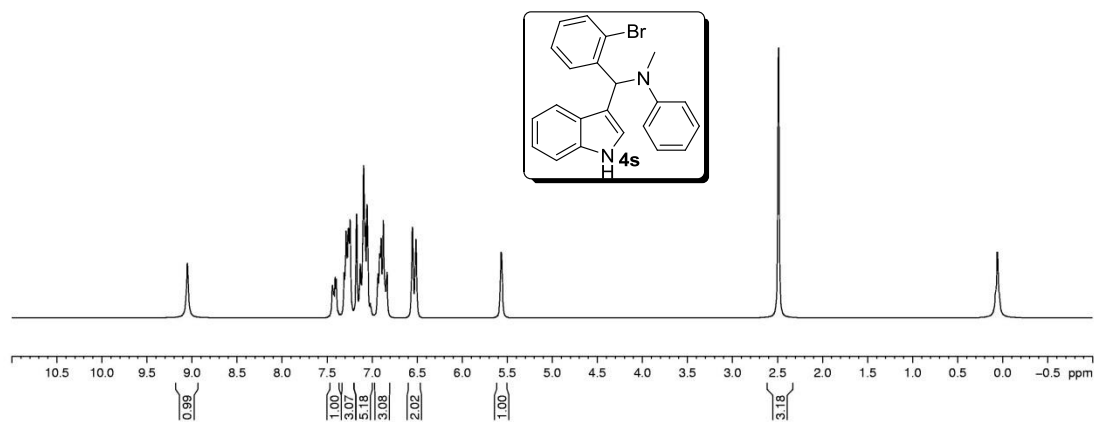

mkq-12t

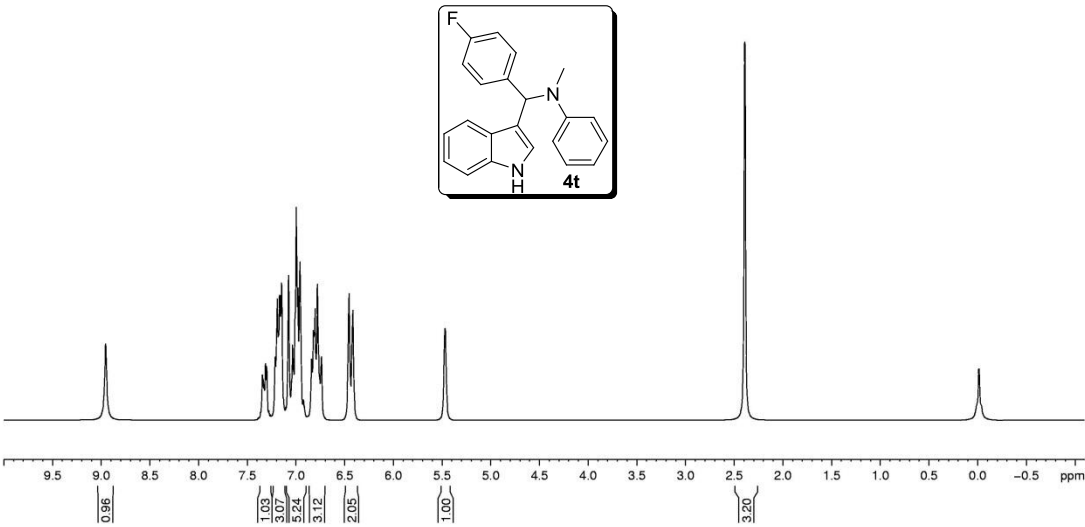

mkq-12u

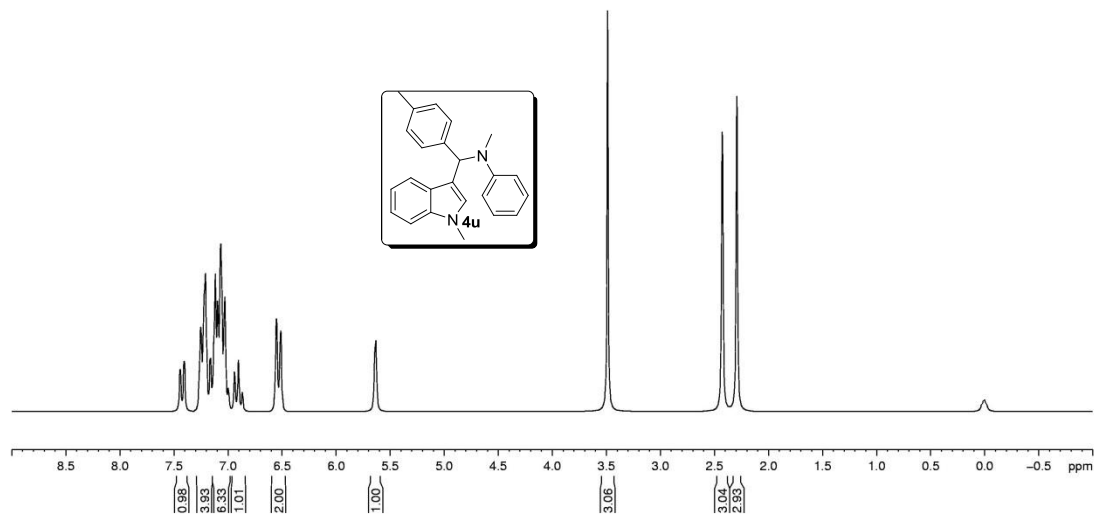

mk9-12v

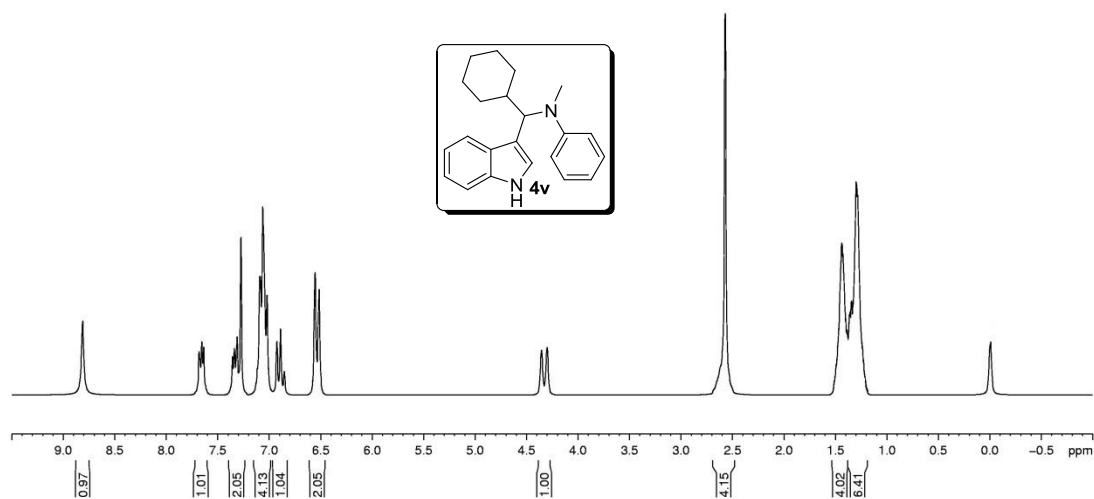

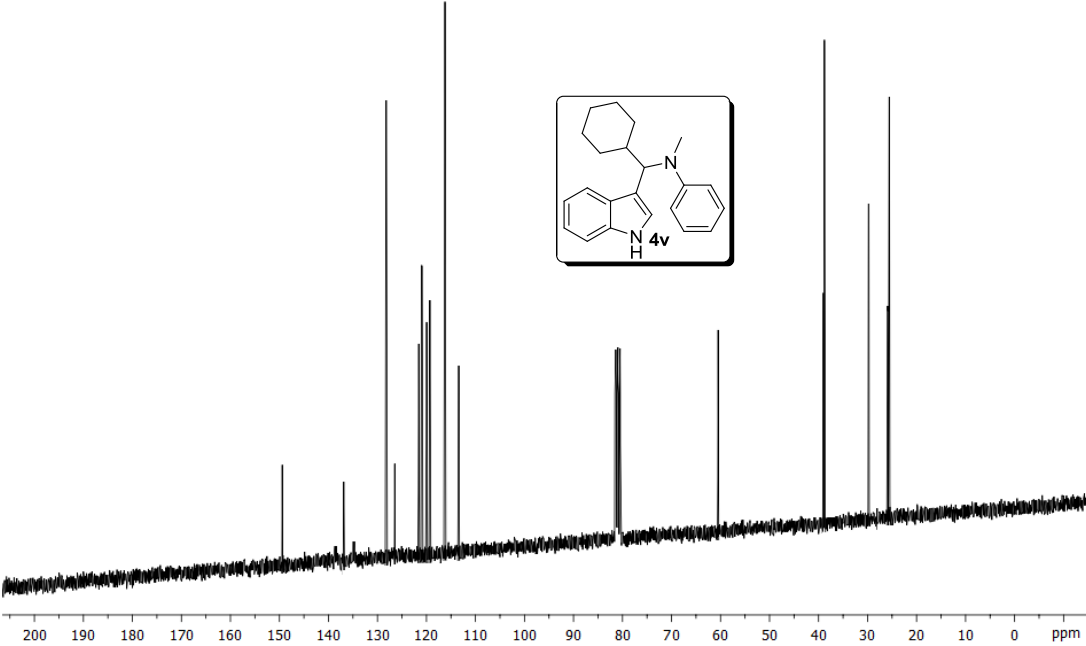

mk<sub>g</sub>-12w

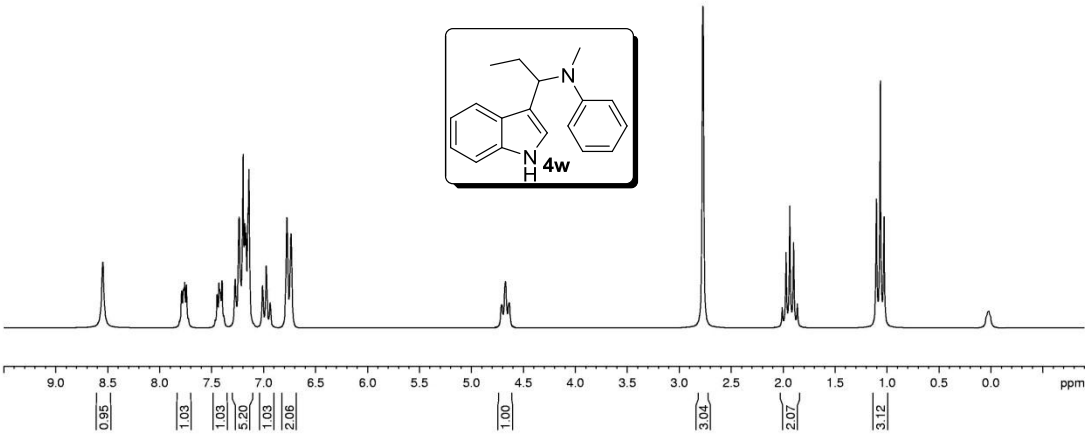

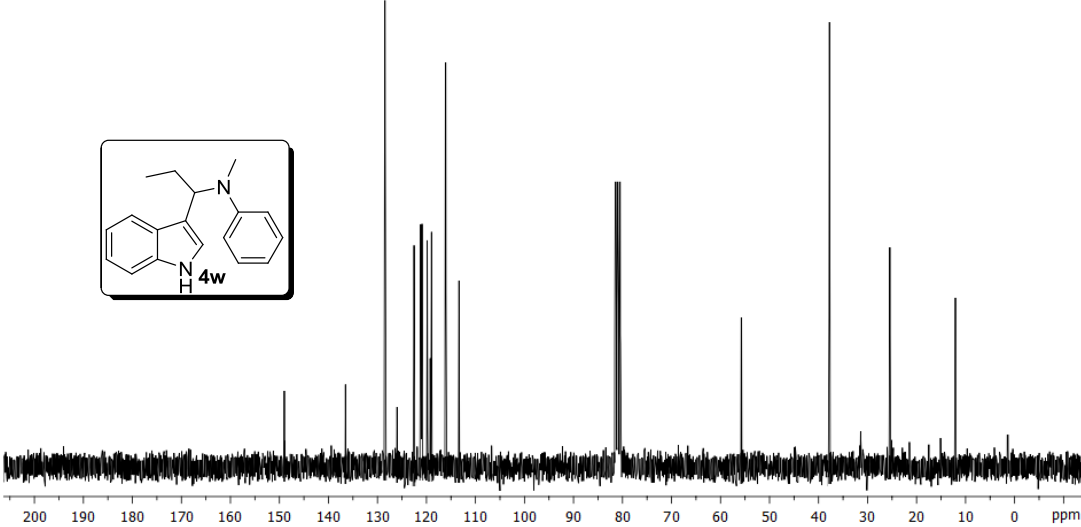

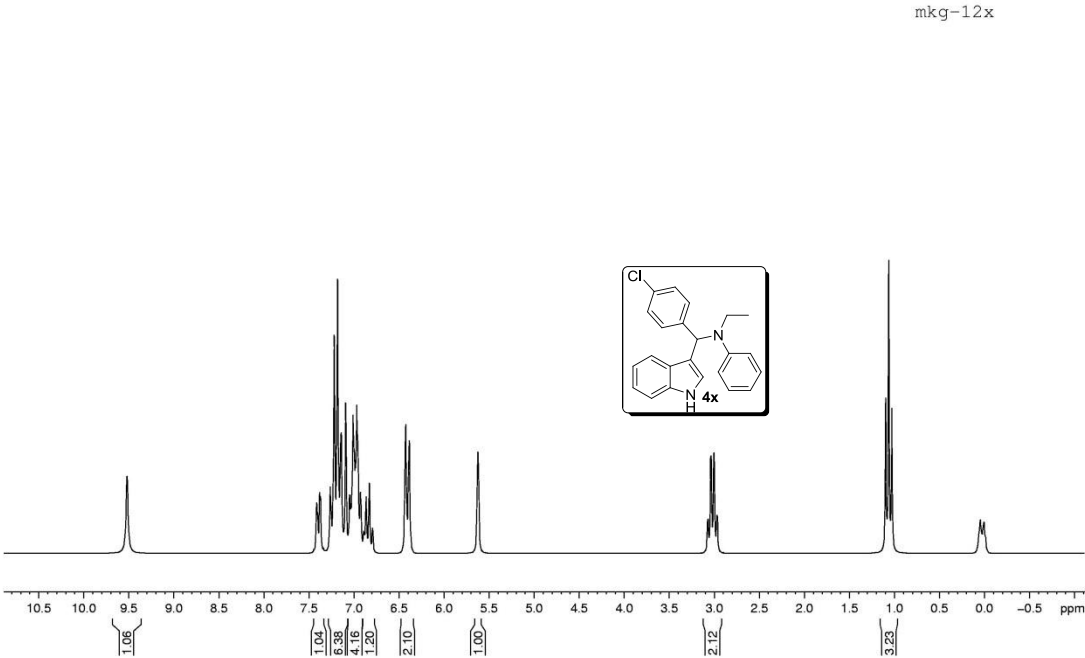

mk $g$ -12y

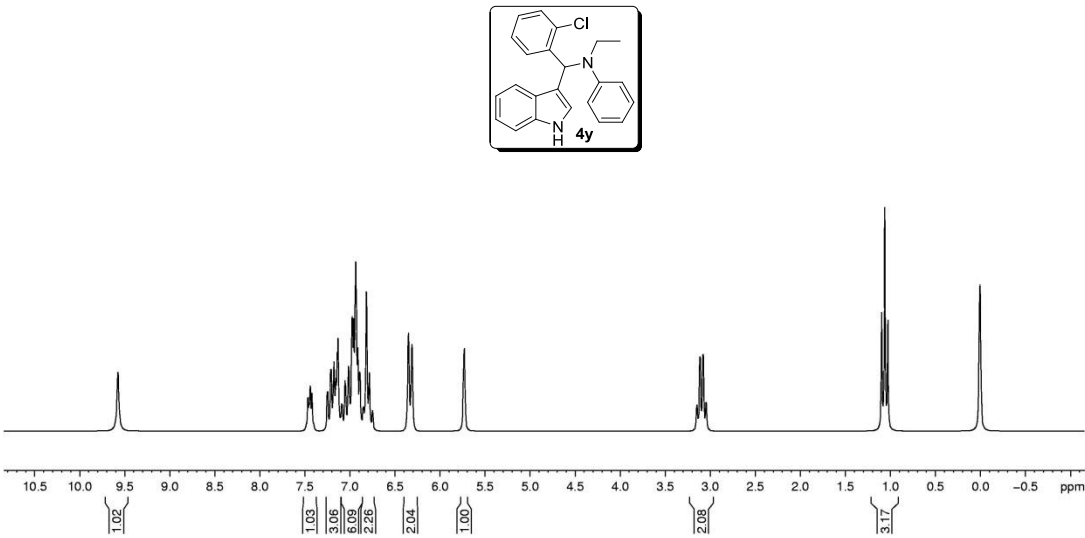

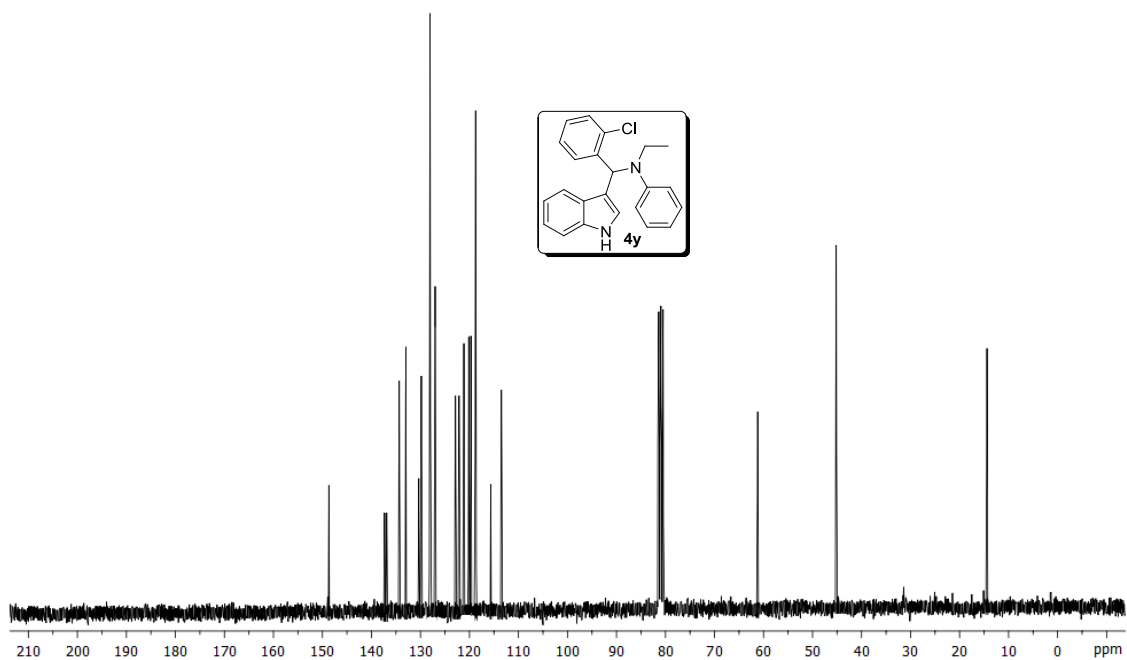

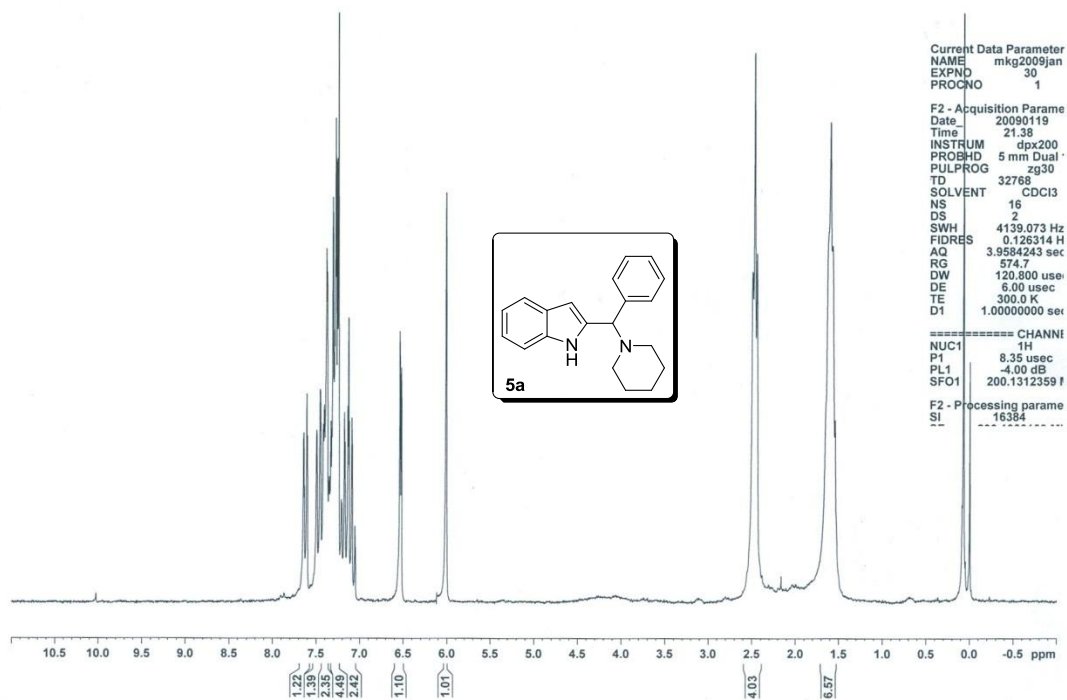

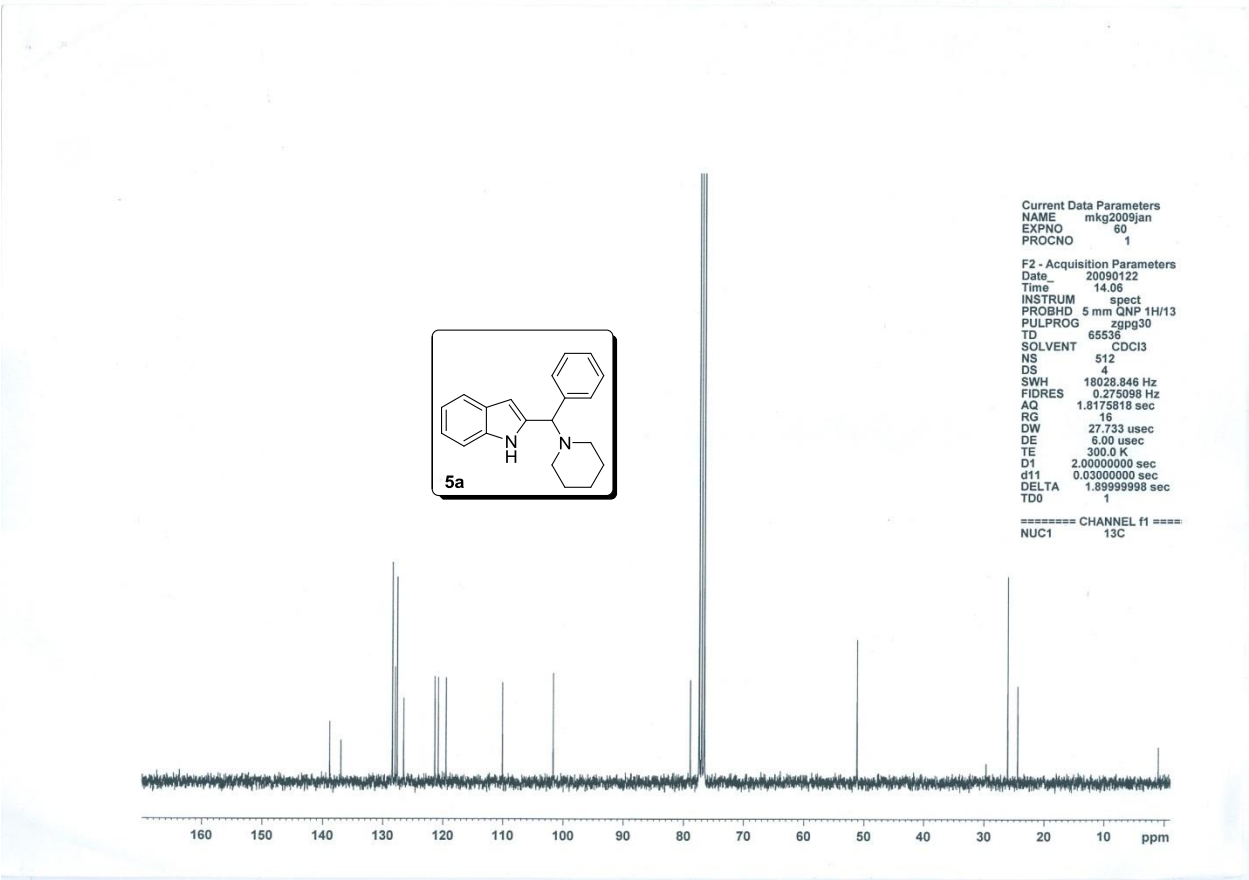

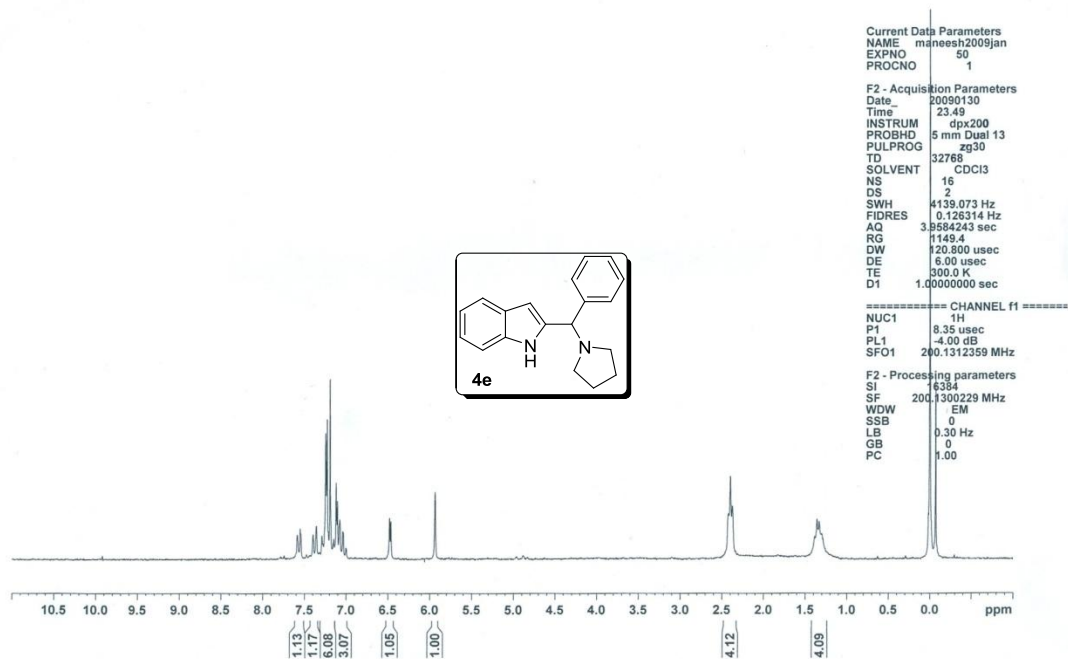

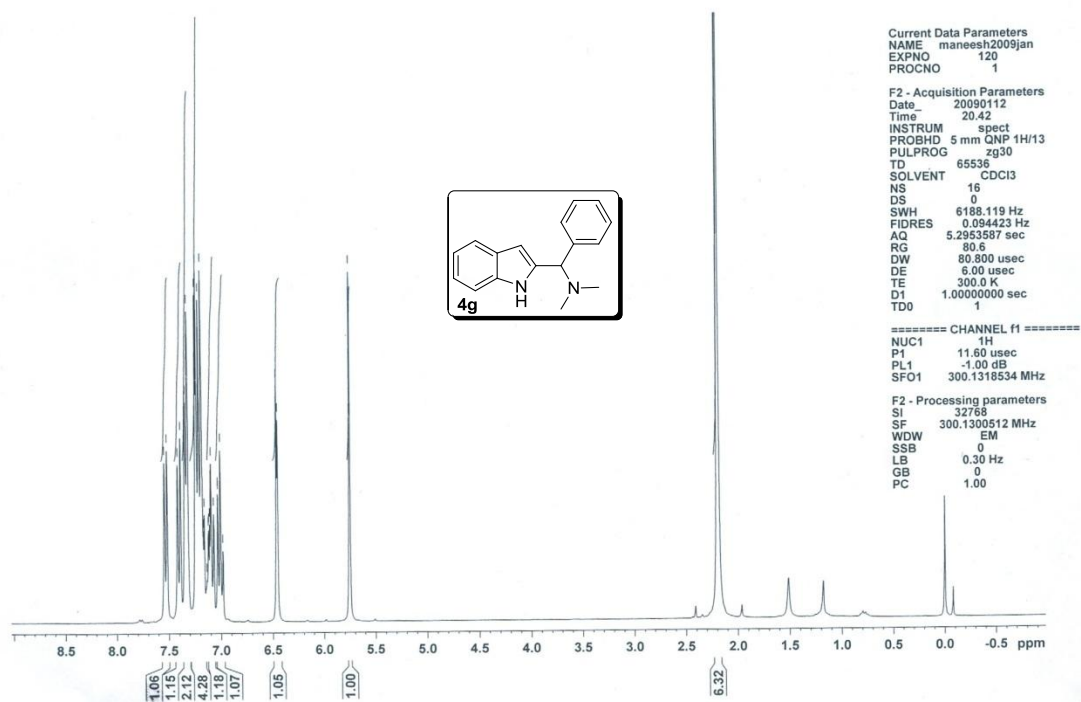

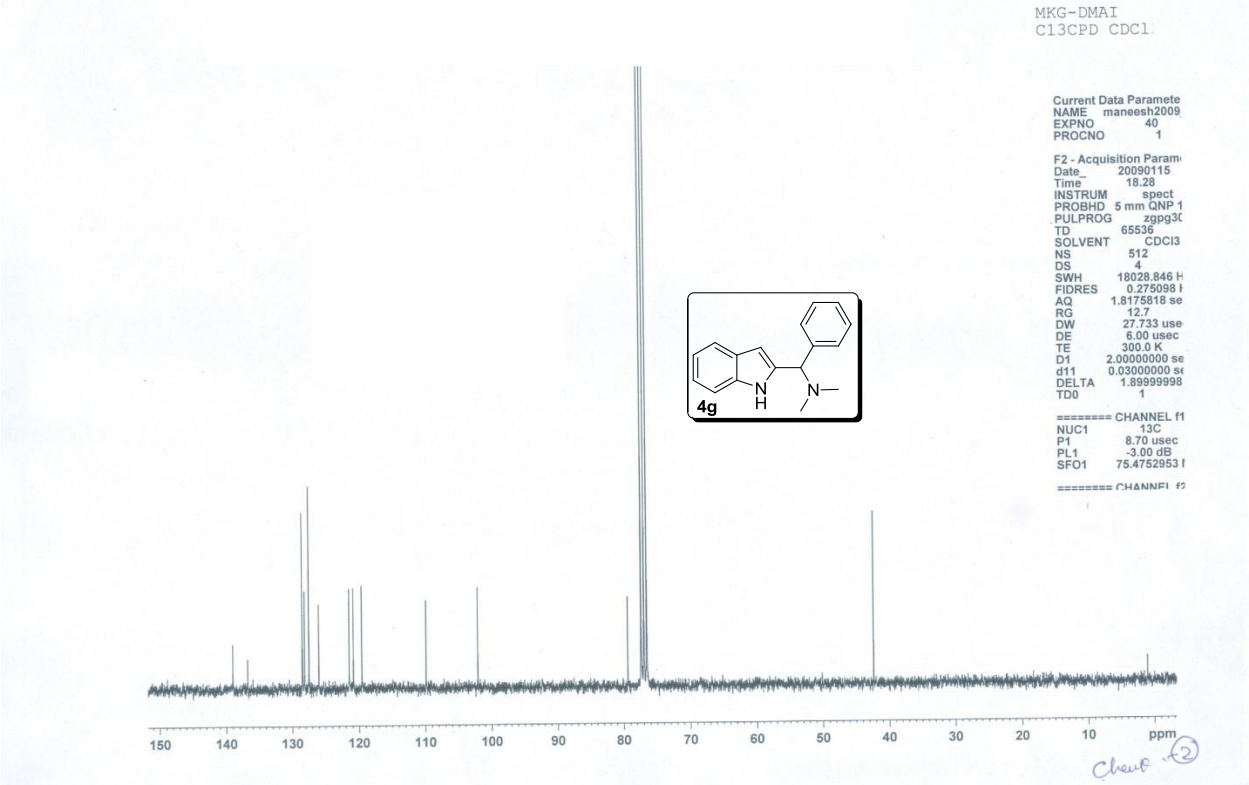

Supplement: c2ra22428c.pdf [file c2ra22428c.pdf]
